# Supplementary material for: Whole Genome Expression Array Profiling Highlights Differences in Mucosal Defense Genes in Barrett's Esophagus and Esophageal Adenocarcinoma
Source: PLoS One. 2011 Jul 28;6(7):e22513. doi: 10.1371/journal.pone.0022513 (PMC3145652; doi:10.1371/journal.pone.0022513)
Supplement: Table S1 — ANOVA and Fold-change Data for Discriminating Genes in Squamous to BE and BE to EAC Comparisons Across 4 Cohorts. For inclusion genes must show a sub threshold (p<0.01 in SDH-54, Gomes-41 & Greenawalt-102, and p<0.05 in Hao-34, as described in the Methods) false discovery rate (FDR) adjusted p value, as well as a >1.2 fold mean sample group comparisons for squamous to BE and BE to EAC comparisons in at least 3 of the 4 cohorts. Columns A to C contain gene details, columns E to H contain Benjamini & Hochberg FDR adjusted Welsh p values for each study, columns J to M contain squamous to BE mean group fold change values for each study, columns O to R contain BE to EAC mean group fold change values for each study, columns T to W show the number of probes on each chip for a given gene for each study and column Y shows the fraction of studies that meet the p value + fold change requirements out of the total number of studies with representative probes for a given gene. (XLSX) [file pone.0022513.s001.xlsx]

## Sheet: Table_S1 +FDR_851_list
lookup	from_DAVID	from_DAVID		FDR_0.01	FDR_0.01	FDR_0.01	FDR_0.05		BE/S ratio	BE/S ratio	BE/S ratio	BE/S ratio		EAC/BE ratio	EAC/BE ratio	EAC/BE ratio	EAC/BE ratio		# probes	# probes	# probes	# probes		FDR_data
Entrez_ID	SYMBOL	Name		ACS	GOMES	GREENAWALT	HAO		ACS	GOMES	GREENAWALT	HAO		ACS	GOMES	GREENAWALT	HAO		ACS	GOMES	GREENAWALT	HAO		Count
34	ACADM	acyl-Coenzyme A dehydrogenase, C-4 to C-12 straight chain			0.000109	9.05e-10	0.0224			-1.93978	-2.62123	-3.89781			-1.47709	-1.36284			1	1	1	1		3/4
35	ACADS	acyl-Coenzyme A dehydrogenase, C-2 to C-3 short chain		5.32e-09	0.00148	0.00862			2.64353	-1.11586	-1.64062			-1.49911	-1.00452	1.58413			1	1	1	1		3/4
90	ACVR1	activin A receptor, type I		7.92e-05		3.05e-06	0.03		1.82708		1.93787	1.57301		1.16339		1.11527	2.6651		1	0	1	2		3/3
103	ADAR	adenosine deaminase, RNA-specific		3.28e-06	0.00016	2.62e-05	0.00963		1.64984	-1.6745	1.63675	1.44309		1.55163	1	1.01371	2.08682		2	1	1	1		4/4
109	ADCY3	adenylate cyclase 3		2.06e-06	0.00347	4.08e-05			-1.0991	1.13307	-1.31114			2.12838	1.13322	2.43994			1	1	1	0		3/3
125	ADH1B	alcohol dehydrogenase 1B (class I), beta polypeptide; alcohol dehydrogenase 1A (class I), alpha polypeptide; alcohol dehydrogenase 1C (class I), gamma polypeptide		2.61e-05		0.00198	0.0119		2.5098		2.39919	6.18921		-2.24561		-2.10517	-3.62506		1	1	1	1		3/4
126	ADH1C	alcohol dehydrogenase 1B (class I), beta polypeptide; alcohol dehydrogenase 1A (class I), alpha polypeptide; alcohol dehydrogenase 1C (class I), gamma polypeptide		1.55e-12		8.1e-07	0.00718		24.1699		13.8948	4.30418		-4.77373		-2.08602	-6.66274		1	0	1	1		3/3
130	ADH6	alcohol dehydrogenase 6 (class V)		0.000706		2.33e-06	0.0131		2.00317		10.5295	6.35152		-1.64783		-7.18252	-7.38829		1	0	2	4		3/3
131	ADH7	alcohol dehydrogenase 7 (class IV), mu or sigma polypeptide		7.06e-07		1.27e-08	0.02		-4.63256		-4.60663	-1.40085		-1.88184		-1.97941	-3.38628		1	0	1	1		3/3
132	ADK	adenosine kinase		3.38e-06		1.95e-07	0.0106		-2.4727		-2.75134	-3.23967		1.30891		1.10695	1.6832		3	0	1	1		3/3
133	ADM	adrenomedullin		0.000817		0.00165	0.00217		-2.63126		-1.83962	-3.49858		1.36754		1.13915	3.11048		1	0	1	1		3/3
136	LOC100131909	hypothetical LOC100131909; adenosine A2b receptor			0.000487	1.55e-05	0.0407			-1.4068	-2.22414	-2.75772			-1.08857	1.80517	3.26366		1	1	1	1		3/4
166	AES	amino-terminal enhancer of split		0.00803		2.81e-10	0.0359		1.49456		-2.73319	-1.71406		-1.38565		-1.34012	1.47551		2	1	1	1		3/4
175	AGA	aspartylglucosaminidase		0.000688	0.00819	3.64e-06	0.0492		-1.53583	-1.45644	1.14541	-2.39913		-1.26351	-1.2304	-3.25619	1.69414		1	1	1	2		4/4
202	AIM1	absent in melanoma 1		4.3e-06		1.99e-07	0.00424		-2.18881		-2.84955	-3.20896		-1.6374		-1.73969	-1.25		2	1	1	1		3/4
220	ALDH1A3	aldehyde dehydrogenase 1 family, member A3		0.00185	0.00746	9.5e-06			-2.80958	-3.36628	-6.02028			1.38204	1.23256	2.24746			1	1	1	1		3/4
223	ALDH9A1	aldehyde dehydrogenase 9 family, member A1		0.000191		0.00103	0.00728		-1.77701		-3.38373	-2.42857		-1.09848		1.6197	1.03992		1	0	1	1		3/3
247	ALOX15B	arachidonate 15-lipoxygenase, type B		5.2e-06		4.55e-09	0.0197		-2.23125		-7.23661	5.82712		-1.08597		-1.29725	-3.94206		1	0	1	3		3/3
262	AMD1	adenosylmethionine decarboxylase 1			0.00384	7.8e-06	0.0155			-1.54987	-1.71665	-1.90512			-1.45083	-1.06706			1	1	2	2		3/4
271	AMPD2	adenosine monophosphate deaminase 2 (isoform L)		1.52e-07		1.93e-09	0.0321		1.47028		2.09365	3.08554		1.34886		1.04246	1.37393		3	0	1	1		3/3
272	AMPD3	adenosine monophosphate deaminase (isoform E)		0.00459		0.000176	0.0296		-1.37655		-2.83489	-2.76899		1.26945		1.76324			1	0	1	1		3/3
283	ANG	angiogenin, ribonuclease, RNase A family, 5		1.83e-13		8.36e-10	0.00461		10.7965		3.38846	12.2823		-2.02288		-1.33082	-4.4993		3	1	2	3		3/4
301	ANXA1	annexin A1		2.01e-08		0.00142	0.00743		-4.35294		-2.53667	-9.35714		-1.94465		1.14435	1.13393		1	0	1	1		3/3
307	ANXA4	annexin A4		5.12e-10		1.03e-05	0.022		4.54348		2.97705	3.73249		1.16328		1.46586	-1.2181		1	1	1	2		3/4
309	ANXA6	annexin A6		0.00177		0.000858	0.0497		1.21854		1.14877	2.59007		1.2385		1.84226	3.65941		1	0	1	1		3/3
339	APOBEC1	apolipoprotein B mRNA editing enzyme, catalytic polypeptide 1		5.2e-09	0.000503	2.53e-07			3.64865	1.16736	16.6351			-2.0167	1.07885	-4.10847			1	1	1	2		3/4
360	AQP3	aquaporin 3 (Gill blood group)		1.28e-10	0.000354	2.93e-07	0.00865		-7.62351	-3.43307	-6.63602	-2.32135		-1.18586	-1.60084	5.82116	-1.5614		1	1	2	2		4/4
379	ARL4D	ADP-ribosylation factor-like 4D		7.81e-11		6.82e-14	0.0425		-3.56936		-7.10052	-10.6891		-1.09223		1.70103	5.46218		1	1	2	1		3/4
390	RND3	Rho family GTPase 3		9.36e-05		1.52e-06	0.00156		-3.53389		-4.58163	-4.77293		1.20055		1.3207	1.38428		1	0	3	3		3/3
427	ASAH1	N-acylsphingosine amidohydrolase (acid ceramidase) 1			0.000846	6.1e-06	0.0367			-2.03515	-1.95502	-2.47024			-1.6119	-1.17879	-1.15596		3	1	1	2		3/4
472	LOC651610	similar to Serine-protein kinase ATM (Ataxia telangiectasia mutated) (A-T, mutated); ataxia telangiectasia mutated			0.000902	9.82e-05	0.0112			1.13875	2.28702	1.49018			1.09835	-1.19357	-5.29236		3	2	2	3		3/4
476	ATP1A1	ATPase, Na+/K+ transporting, alpha 1 polypeptide		1.88e-06		0.000857	0.0146		1.89327		2.84488	-1.32008		1.07104		-1.67579	-38.3203		1	0	1	2		3/3
478	ATP1A3	ATPase, Na+/K+ transporting, alpha 3 polypeptide			0.00868	0.000133	0.00823			1.12263	-3.45242	1.28304			1.07105	2.76135	-6.47222		1	1	1	1		3/4
489	ATP2A3	ATPase, Ca++ transporting, ubiquitous		1.51e-11		2.28e-08	0.0207		5.66239		6.42876	7.8048		-2.54563		-2.56681			1	0	1	1		3/3
490	ATP2B1	ATPase, Ca++ transporting, plasma membrane 1		9.62e-07		0.00517	0.0212		1.69609		1.6875	2.74538		-1.09261		1.07204	-4.36652		1	0	2	2		3/3
493	ATP2B4	ATPase, Ca++ transporting, plasma membrane 4			0.00303	1.56e-08	0.0223			1.14462	-4.38136	-2.83372			1.20341	-1.37154	1.36534		1	1	3	3		3/4
518	ATP5G3	ATP synthase, H+ transporting, mitochondrial F0 complex, subunit C3 (subunit 9)		0.0015		2.21e-06	0.0367		1.65335		-3.57824	-1.36443		-1.12445		3.42325	-4.3447		1	0	2	2		3/3
535	ATP6V0A1	ATPase, H+ transporting, lysosomal V0 subunit a1		0.00581	0.00168	1.47e-06			1.16893	1.13783	2.18003			1.28613	1.02476	-1.048			1	1	2	1		3/4
563	AZGP1P1	alpha-2-glycoprotein 1, zinc-binding pseudogene 1; alpha-2-glycoprotein 1, zinc-binding		4.16e-06		3.63e-06	0.0218		3.49561		3.74289	9.60418		1.02258		-1.09346	1.02333		2	1	1	1		3/4
590	BCHE	butyrylcholinesterase		0.00725	0.00369	0.000153			1.10095	1.12453	-5.31277			-1.06837	1.10319	3.28298			1	1	1	1		3/4
604	BCL6	B-cell CLL/lymphoma 6		0.00359		3.2e-05	0.0172		-1.49002		-1.41551	-2.14347		1.62219		-1.22683	4.99572		4	0	2	4		3/3
623	BDKRB1	bradykinin receptor B1		3.49e-05		1e-11	0.0164		-1.6898		-4.05831	-3.20732		-1.02444		1.01895			1	0	1	1		3/3
629	CFB	complement factor B		6.9e-11		7.08e-07	0.0155		5.98492		3.16619	6.10007		1.82116		1.38371	2.38182		1	0	1	2		3/3
637	BID	BH3 interacting domain death agonist		2.07e-06		0.000118	0.000825		1.37547		-1.58442	1.11485		1.55414		2.25812	3.42651		2	1	1	3		3/4
644	BLVRA	biliverdin reductase A		0.00879		8.2e-08	0.0251		-1.9596		-2.65912	-3.45767		1.04545		1.07547	1.45503		1	1	1	1		3/4
646	BNC1	basonuclin 1		0.00116	6.33e-05	2.16e-11	0.0409		-1.30278	-3.28529	-6.06143	-4.1147		1.00824	-1.27341	1.96928			1	1	1	1		4/4
653	BMP5	bone morphogenetic protein 5		0.000753		2.57e-06	0.0241		1.24289		2.98054	2.09608		-1.13828		-2.02647	1.20814		1	0	1	1		3/3
655	BMP7	bone morphogenetic protein 7		0.00294		3.83e-07	0.0138		-1.40563		-3.04335	-4.31452		-1.039		1.50374	8.68952		1	0	1	3		3/3
665	BNIP3L	BCL2/adenovirus E1B 19kDa interacting protein 3-like		0.00362		3.45e-11	0.00754		-1.63678		-2.94298	-3.39706		1.07471		1.01669	1.16176		1	0	1	2		3/3
672	BRCA1	breast cancer 1, early onset		0.000474	0.00366	6.53e-05			1.04131	1.08691	-2.25387			1.35402	1.07169	1.77448			4	1	1	2		3/4
701	BUB1B	budding uninhibited by benzimidazoles 1 homolog beta (yeast)		0.000286	0.00955	0.00847			1.0303	1.12388	-1.33122			1.43611	1.10044	1.84645			1	1	1	1		3/4
710	SERPING1	serpin peptidase inhibitor, clade G (C1 inhibitor), member 1		3.06e-07	0.00245	0.000191	0.0297		1.60267	-1.0627	1.2413	3.78576		1.31281	-1.12695	2.30736	2.40856		1	1	1	4		4/4
715	C1R	complement component 1, r subcomponent			0.00593	7.81e-05	0.00355			1.16268	-1.6439	1.95986			1.10123	3.7935	3.83386		1	1	1	2		3/4
753	C18ORF1	chromosome 18 open reading frame 1		0.000294	0.00348	5.97e-08			1.29242	1.14067	2.49849			1.09963	1.06292	-1.23254			1	1	1	3		3/4
754	PTTG1IP	pituitary tumor-transforming 1 interacting protein		9.34e-09	0.000564	0.000106	0.00407		2.68441	-1.03529	1.04997	-1.04447		-1.14147	-1.57407	-1.80119	-5.68539		1	1	1	1		4/4
760	CA2	carbonic anhydrase II		2.7e-08		3.4e-09	0.0323		12.1452		13.1385	11.8415		-5.07071		-3.56855	-4.28956		1	0	1	2		3/3
768	CA9	carbonic anhydrase IX		6.72e-09		2.35e-06	0.0128		5.43798		10.6569	-1.08632		-2.34224		-1.52698	-2.86145		1	0	1	1		3/3
771	CA12	carbonic anhydrase XII		5.06e-08		2.47e-11	0.00499		-2.86376		-4.20565	-4.19008		-1.0826		1.34274	3.68595		2	0	1	2		3/3
790	CAD	carbamoyl-phosphate synthetase 2, aspartate transcarbamylase, and dihydroorotase			0.00229	3.07e-05	0.0125			1.17998	-9.75076	-1.98207			1.14029	5.98176	1.49602		1	1	2	2		3/4
810	CALML3	calmodulin-like 3		2.59e-09		3.67e-07	0.0326		-22.1571		-7.17706	-3.11692		-1.47213		1.4389	-1.07261		1	0	1	2		3/3
823	CAPN1	calpain 1, (mu/I) large subunit		0.00307	0.000605	1.93e-08			-1.46996	-1.98978	-1.96125			-1.0603	-1.3943	-1.51608			1	1	1	1		3/4
831	CAST	calpastatin		0.000785	0.000141	1.7e-05	0.0111		-1.80376	-1.3699	-3.00218	-3.04348		-1.4626	-1.33396	-1.16035	-1.625		7	2	1	2		4/4
836	CASP3	caspase 3, apoptosis-related cysteine peptidase		0.000423	0.0062	0.000159	0.0153		1.88946	-1.03365	-3.00119	1.13636		-1.33032	-1.26214	2.80975	-2.49126		2	1	2	4		4/4
839	CASP6	caspase 6, apoptosis-related cysteine peptidase		1.89e-06	3.39e-05	2.35e-05	0.0184		1.25876	1.24713	-1.42978	4.11542		1.02334	1.03303	-1.51538	-1.83125		2	1	1	1		4/4
861	RUNX1	runt-related transcription factor 1		5.69e-05		1.27e-09	0.0174		1.57441		2.03518	2.2374		1.12023		1.11111	2.48382		2	1	2	2		3/4
864	RUNX3	runt-related transcription factor 3		0.000575		0.00131	0.0145		1.09335		-1.103	-1.79121		1.59372		2.07823	7.45879		1	0	1	2		3/3
871	SERPINH1	serpin peptidase inhibitor, clade H (heat shock protein 47), member 1, (collagen binding protein 1)		9.91e-05		1.13e-07	0.0144		1.56		2.07943	2.6839		1.93369		2.35357	7.38942		2	0	1	1		3/3
874	CBR3	carbonyl reductase 3		1.2e-06	0.000111	1.03e-09	0.0278		-3.00549	-4.45494	-3.59334	-4.05763		-1.01958	-1.49359	-1.07134	1.64407		1	1	1	1		4/4
899	CCNF	cyclin F		0.00161	0.00283	0.00674			1.03372	1.09421	1.04818			1.23751	1.15247	1.41982			1	1	1	1		3/4
901	CCNG2	cyclin G2		0.00297		1.46e-05	0.00918		-2.02197		-2.283	-3.49502		-1.05869		-1.4597	-1.00669		1	1	1	2		3/4
929	CD14	CD14 molecule		0.00116	0.00145	3.75e-07			1.13913	1.01431	2.36592			1.76145	-1.20535	-1.36718			1	1	1	2		3/4
947	CD34	CD34 molecule		0.00942		0.000799	0.0331		1.2717		1.33784	3.5763		1.33688		1.69238			1	0	1	2		3/3
953	ENTPD1	ectonucleoside triphosphate diphosphohydrolase 1		0.00016		0.00459	0.0336		1.17225		1.05683	2.52289		1.50986		1.76545	4.14516		2	1	1	7		3/4
956	ENTPD3	ectonucleoside triphosphate diphosphohydrolase 3		2.48e-05		9.49e-07	0.0383		1.37235		-1.29694	-1.02498		-1.49757		-1.95948	-3.00294		1	0	1	1		3/3
957	ENTPD5	ectonucleoside triphosphate diphosphohydrolase 5		2.02e-07		2.91e-06	0.0118		2.55976		2.03757	6.98805		-2.15061		-3.51355	-22.4941		1	0	1	2		3/3
960	CD44	CD44 molecule (Indian blood group)		0.000793	0.00264	0.00554			-1.78266	-2.12397	-1.54167			1.61307	-1.34072	3.25711			1	1	2	4		3/4
977	CD151	CD151 molecule (Raph blood group)		1.64e-08		0.00137	0.0113		1.79441		1.66514	2.9413		-1.03052		1.36226	-1.35774		2	0	1	1		3/3
978	CDA	cytidine deaminase		3.19e-07	1.94e-05	1.03e-10			-5.18267	-3.55137	-4.21169			1.17096	1	-1.00785			1	1	1	1		3/4
996	CDC27	cell division cycle 27 homolog (S. cerevisiae)		0.000405		4.4e-06	0.0328		1.12269		-3.80811	1.32126		1.25338		2.66757	1.26879		1	1	1	4		3/4
1012	CDH13	cadherin 13, H-cadherin (heart)			0.00943	4.2e-06	0.0308			1.08898	-1.45882	-2.18828			1.08078	2.13235	7.34937		1	1	2	2		3/4
1017	CDK2	cyclin-dependent kinase 2		0.000145		0.0002	0.0225		1.09061		-2.03137	-1.19979		1.69706		1.41176	2.6859		2	1	2	1		3/4
1022	CDK7	cyclin-dependent kinase 7		0.00121	0.00321	1.89e-07	0.02		-1.55157	-2.19195	-1.74688	-2.75499		-1.09774	-1.27165	-1.31536	1.34473		1	1	1	3		4/4
1039	CDR2	cerebellar degeneration-related protein 2, 62kDa		1.59e-11	3.64e-06	7.17e-10	0.0299		2.16732	2.14848	3.12417	4.06871		1.44794	-1.11139	1.20227	1.43724		1	1	1	1		4/4
1040	CDS1	CDP-diacylglycerol synthase (phosphatidate cytidylyltransferase) 1		0.000418		4.01e-09	0.003		1.50608		-1.40333	-1.36618		-1.87225		-2.31621	-4.03347		1	1	1	2		3/4
1044	CDX1	caudal type homeobox 1		1.14e-06	0.000919	1.35e-05			5.07091	1.86354	10.7293			1.26753	-1.32801	-1.97101			1	1	1	3		3/4
1045	CDX2	caudal type homeobox 2		5.64e-09	0.00479		0.00287		2.92337	1.14709		-1.23003		1.60722	1.14654		-8.44715		1	1	0	3		3/3
1111	CHEK1	CHK1 checkpoint homolog (S. pombe)		0.00325		0.000698	0.00879		1.06695		1.22997	1.21549		1.3506		1.34844	1.72909		1	0	1	3		3/3
1113	CHGA	chromogranin A (parathyroid secretory protein 1)		5.04e-09	0.000734		0.0313		20.908	1.49704		9.30306		-4.70054	-1.51346		-36.4318		1	1	0	1		3/3
1159	CKMT1A	creatine kinase, mitochondrial 1A; creatine kinase, mitochondrial 1B		0.00215	0.00642	2.19e-06	0.00703		1.54279	1.08341	1.07233	1.12488		-1.90449	-2.11715	-2.0276	-2.26476		1	1	1	3		4/4
1263	PLK3	polo-like kinase 3 (Drosophila)		1.24e-05	0.00552	0.000176			-1.69011	-2.47097	-2.59133			1.12637	1.25591	1.29566			1	1	1	2		3/4
1266	CNN3	calponin 3, acidic		0.000951		3.66e-06	0.00479		-2.5233		-3.39009	-2.70886		1.15412		1.46252	2.23038		1	0	1	2		3/3
1278	COL1A2	collagen, type I, alpha 2		0.000734		3.86e-07	0.0287		2.15598		3.1676	7.85153		2.77492		3.76102	2.20455		1	0	1	2		3/3
1282	COL4A1	collagen, type IV, alpha 1		6.61e-05	6.9e-06	0.00783	0.046		1.45113	2.18493	-1.21547	3.70658		4.84041	3.16526	3.1768	10.2684		1	1	1	3		4/4
1284	COL4A2	collagen, type IV, alpha 2		0.000296		2.6e-07	0.0105		2.54074		2.08791	4.64054		2.10301		2.4	5.19571		1	0	1	2		3/3
1289	COL5A1	collagen, type V, alpha 1		0.000645		9.17e-05	0.0253		1.82648		1.16903	3.32952		1.6375		1.94532	7.33124		2	0	1	2		3/3
1290	COL5A2	collagen, type V, alpha 2		0.000735		0.00743	0.0266		1.63274		-2.39189	3.21837		2.37405		17.464	5.78043		1	0	1	2		3/3
1291	COL6A1	collagen, type VI, alpha 1		3.33e-05	0.00655	0.00145	0.0246		2.03791	1.19864	2.20469	5.61288		1.68217	1.15764	1.72006	7.05334		1	1	2	5		4/4
1293	COL6A3	collagen, type VI, alpha 3		0.0012		1.27e-06	0.0396		1.7802		3.39879	5.60565		2.00164		2.05422	7.2669		1	1	1	1		3/4
1362	CPD	carboxypeptidase D		1.32e-10	4.34e-06	2.29e-05	0.0239		4.93846	1.91755	2.45074	6.16586		-1.62532	-1.87979	-1.76942	1.06465		1	1	2	4		4/4
1382	CRABP2	cellular retinoic acid binding protein 2		1.53e-09		2.18e-12	0.0242		-12.5245		-5.991	-6.71069		-1.01418		-1.07407	1.76101		1	1	1	2		3/4
1410	CRYAB	crystallin, alpha B		8.29e-11		0.000366	0.0349		-6.38991		-3.72656	-4.18505		-1.36534		1.24442	1.86833		1	0	1	1		3/3
1431	CS	citrate synthase			0.0042	3.32e-05	0.00185			-1.27294	-3.87846	-1.96334			-1.51718	2.14308	-4.26957		2	1	2	5		3/4
1462	VCAN	versican			0.00157	5.49e-08	0.0353			1.71313	3.15902	7.08418			-1.26284	2.13069	5.12833		1	1	1	4		3/4
1466	CSRP2	cysteine and glycine-rich protein 2		1.98e-08		2.35e-06	0.0278		-3.8915		-2.55048	-3.09669		-1.01187		-1.14129	1.98473		1	0	1	1		3/3
1475	CSTA	cystatin A (stefin A)		4.52e-09	0.000372	0.000234			-7.6369	-15.6436	-1.93986			-2.688	-5.28105	-1.50388			1	1	1	1		3/4
1510	CTSE	cathepsin E		1.52e-08		6.11e-09	0.00589		3.21581		29.8179	41.5147		-1.7037		-1.60517	-3.35255		2	0	1	1		3/3
1519	CTSO	cathepsin O		2.86e-09		0.000629	0.0359		2.20195		-1.26598	2.31905		-1.19752		2.86872	-1.18376		1	0	2	4		3/3
1522	CTSZ	cathepsin Z			0.000425	0.000312	0.0138			2.15109	1.21928	3.46505			-1.00325	2.42589	1.16971		1	1	1	2		3/4
1601	DAB2	disabled homolog 2, mitogen-responsive phosphoprotein (Drosophila)		2.89e-05	0.00179	3.61e-09			2.07024	1.08918	3.04481			1.47054	1.07912	1.03478			1	1	5	3		3/4
1602	DACH1	dachshund homolog 1 (Drosophila)		4.47e-06		5.29e-07	0.00603		2.16031		2.68072	14.1899		-1.20815		-1.41901			2	0	1	4		3/3
1606	DGKA	diacylglycerol kinase, alpha 80kDa		0.000897	0.00173	8.13e-08			-1.51097	-1.88658	-1.30293			-1.24286	-1.03119	-1.94921			3	1	1	2		3/4
1611	DAP	death-associated protein		8e-08	0.000371	6.5e-08	0.0193		3.29894	2.10133	2.61012	3.74737		1.07458	-1.74039	-1.12943	-1.55572		1	1	1	1		4/4
1612	DAPK1	death-associated protein kinase 1		1.28e-10		2.22e-10	0.00226		4.69551		4.98617	3.25044		1.04027		-1.66645			1	1	1	3		3/4
1628	DBP	D site of albumin promoter (albumin D-box) binding protein		1.13e-09		2.81e-06	0.0497		2.93189		2.15789	3.38967		-1.2827		-1.84651	-1.85304		2	0	1	3		3/3
1646	AKR1C2	aldo-keto reductase family 1, member C2 (dihydrodiol dehydrogenase 2; bile acid binding protein; 3-alpha hydroxysteroid dehydrogenase, type III)		0.00195		0.00468	0.0219		1.34705		1.18999	1.07189		-3.98892		-2.0764	-2.68548		1	0	1	1		3/3
1803	DPP4	dipeptidyl-peptidase 4		2.09e-08	0.000354	7.15e-07			3.62126	3.57795	19.3077			-1.00879	-1.85054	-2.25072			1	1	1	1		3/4
1808	DPYSL2	dihydropyrimidinase-like 2		1.54e-07		1.94e-07	0.0112		2.56236		2.9353	3.84592		1.58155		1.23678	2.90456		1	0	1	1		3/3
1809	DPYSL3	dihydropyrimidinase-like 3		0.00186	0.000348	1.22e-05			1.76728	1.18341	2.03237			1.19074	1.19291	1.47024			1	1	1	1		3/4
1824	DSC2	desmocollin 2		1.51e-06		2.25e-07	0.022		-2.22738		-6.03571	-3.44262		-1.43007		1.98496	1.26885		1	0	2	3		3/3
1827	RCAN1	regulator of calcineurin 1		9.36e-05	0.00858		0.0427		2.01322	1.05243		3.51321		1.15271	-1.33172		1.88134		1	1	1	2		3/4
1829	DSG2	desmoglein 2		1.01e-08		2.72e-08	0.0224		1.75926		4.71533	5.06157		1.10283		-1.92033	-1.00442		1	0	1	2		3/3
1830	DSG3	desmoglein 3 (pemphigus vulgaris antigen)		1.14e-09		1.55e-14	0.0489		-10.1022		-9.08743	-1.32444		-1.05388		1.2623	-9.68707		1	0	1	2		3/3
1832	DSP	desmoplakin		1.35e-07		1.15e-09	0.0028		-2.49399		-3.22008	-5.9433		-1.07521		-1.30151	-1.10227		1	0	1	2		3/3
1848	DUSP6	dual specificity phosphatase 6		0.00177		3.93e-06	0.00861		1.42647		1.65906	4.54124		1.18643		1.25046	2.06908		2	0	1	3		3/3
1893	ECM1	extracellular matrix protein 1		8.2e-09		9.29e-08	0.00179		-13.5429		-2.28571	-5.35681		-1.33245		-2.19376	1.1831		2	0	1	1		3/3
1912	PHC2	polyhomeotic homolog 2 (Drosophila)		0.000109	0.00698	2.37e-05			1.57347	1.40631	1.66281			1.1913	1.15054	1.05573			3	1	1	1		3/4
1947	EFNB1	ephrin-B1		1.19e-08	0.00119	0.000292	0.0437		1.58808	1.22312	1.76588	1.84297		1.0913	1.09532	-1.30749	1.40046		1	1	1	2		4/4
1948	EFNB2	ephrin-B2		1.21e-06	0.00188	1.36e-08	0.0194		2.70624	-1.53402	3.26869	3.00803		-1.15749	-1.32809	1.30655	1.24644		1	1	1	3		4/4
1951	SLC26A6	solute carrier family 26, member 6; cadherin, EGF LAG seven-pass G-type receptor 3 (flamingo homolog, Drosophila)		4.65e-09	0.00357	7.86e-07			1.28997	1.08582	3.55479			1.72051	1.09021	-1.19878			2	1	1	1		3/4
1952	CELSR2	cadherin, EGF LAG seven-pass G-type receptor 2 (flamingo homolog, Drosophila)		1.16e-06	0.00209	1.71e-10	0.0123		-2.05491	-2.05629	-4.35551	-7.62424		1.11916	-1.07092	1.39501	3.47879		1	1	1	1		4/4
1969	EPHA2	EPH receptor A2		4.69e-07	0.00316	2.36e-09			-3.54351	-1.72093	-3.76583			1.61248	1.13953	1.35788			1	1	1	2		3/4
1992	SERPINB1	serpin peptidase inhibitor, clade B (ovalbumin), member 1		1.33e-05		0.000282	0.00126		-2.13107		-8.17511	-2.55819		-1.73529		4.11577	-1.43686		1	0	2	4		3/3
2002	ELK1	ELK1, member of ETS oncogene family		2.94e-05	0.00614		0.0259		1.23537	-1.34993		-1.24683		1.50543	-1.0066		1.99206		1	1	1	2		3/4
2004	ELK3	ELK3, ETS-domain protein (SRF accessory protein 2)			0.000923	1.81e-08	0.00629			-2.21712	-2.75868	-2.58747			-1.09112	1.94516	4.04961		1	1	2	3		3/4
2012	EMP1	epithelial membrane protein 1		7.42e-08	9.29e-05	1.29e-07			-6.842	-33.817	-3.39195			-1.19048	-1.65969	-1.98856			1	1	1	0		3/3
2013	EMP2	epithelial membrane protein 2		0.000285		3.61e-07	0.00547		-2.23523		-3.76453	-3.19653		-1.02873		-1.37088	1.48555		3	0	1	2		3/3
2035	EPB41	erythrocyte membrane protein band 4.1 (elliptocytosis 1, RH-linked)		0.00268		0.00678	0.00217		-1.11426		1.03068	-1.54126		-1.0356		-1.46918	-5.81301		1	0	2	3		3/3
2037	EPB41L2	erythrocyte membrane protein band 4.1-like 2		1.88e-06	0.00437	2.11e-08	0.0224		1.33214	1.2328	2.52135	3.32406		1.30852	1.11544	-1.08975	1.20578		2	1	1	3		4/4
2040	STOM	stomatin		0.000164		0.000157	0.0169		1.7291		1.4653	2.84462		1.48743		1.13684	1.2535		2	0	1	4		3/3
2048	EPHB2	EPH receptor B2		3.63e-09		2.53e-07	0.0453		2.09443		2.40394	6.58177		1.87361		1.48839	2.59199		2	1	2	4		3/4
2054	STX2	syntaxin 2		0.00278		0.0076	0.0476		1.1048		-3.65635	3.5123		1.14427		3.71672	2.37272		2	0	2	2		3/3
2059	EPS8	epidermal growth factor receptor pathway substrate 8		1.53e-08	3.09e-05	1.18e-09			2.38376	1.39535	4.92321			1.03407	1.048	-1.37543			1	1	1	1		3/4
2120	ETV6	ets variant 6		1.23e-06	0.000393	5.54e-07			1.56369	1.14471	-1.81017			1.11612	1.11595	-1.01959			1	1	1	4		3/4
2122	MECOM	ecotropic viral integration site 1		3.15e-07	0.00212		0.0226		2.59546	1.14851		2.72562		-1.14321	1.16289		-7.61663		1	1	1	2		3/4
2125	EVPL	envoplakin		5.28e-10	0.00296	7.17e-08	0.0269		-6.99688	-7.83832	-5.29607	-5.49174		1.02808	-1.23704	1.05774	25.4628		1	1	2	1		4/4
2135	EXTL2	exostoses (multiple)-like 2		0.0032	0.0097		0.0136		1.1151	2.22		2.44281		1.0625	-1.43901		1.11512		1	1	1	2		3/4
2139	EYA2	eyes absent homolog 2 (Drosophila)		0.000409	1.94e-05	1.32e-10			-1.27014	-1.65522	-2.22051			-2.1888	-2.12698	-1.98201			4	1	1	1		3/4
2153	F5	coagulation factor V (proaccelerin, labile factor)		6.54e-07		2.84e-05	0.0253		1.87405		12.9897	5.77589		-1.13308		-2.059	-1.25442		1	0	1	2		3/3
2185	PTK2B	PTK2B protein tyrosine kinase 2 beta			0.00977	3.57e-08	0.00388			1.25276	3.78753	1.11257			-1.65614	1.06402	-5.75141		2	1	1	2		3/4
2191	FAP	fibroblast activation protein, alpha		0.0094		0.000812	0.0329		1.02176		1.19807	2.50047		1.6927		3.61425	-1.59244		1	1	1	2		3/4
2200	FBN1	fibrillin 1		0.000212		1.77e-05	0.0261		1.54545		1.68771	-1.73693		1.34874		1.72441			1	1	1	4		3/4
2203	FBP1	fructose-1,6-bisphosphatase 1		1.34e-07		5.97e-08	0.00864		12.5224		8.37863	8.32195		-1.41723		-2.32467	-2.00517		1	1	1	1		3/4
2205	FCER1A	Fc fragment of IgE, high affinity I, receptor for; alpha polypeptide		0.00025		5.28e-12	0.0384		-1.70085		-3.24582	-5.19753		-1.32286		-2.44697	1.65432		1	0	1	1		3/3
2217	FCGRT	Fc fragment of IgG, receptor, transporter, alpha		1.79e-09		1.36e-10	0.0065		5.92692		5.02636	2.675		-1.10545		-1.52207	1.18091		1	0	1	4		3/3
2219	FCN1	ficolin (collagen/fibrinogen domain containing) 1		0.000464	0.000445	0.000166			1.03184	1.20932	1.77225			2.38862	1.09284	1.21787			1	1	2	2		3/4
2222	FDFT1	farnesyl-diphosphate farnesyltransferase 1		0.00659	0.000132	0.00139			1.84994	-1.25428	1.4375			-1.38432	-1.65253	-1.67151			1	1	2	1		3/4
2239	GPC4	glypican 4		1.23e-09		2.05e-06	0.0188		1.6946		2.2216	6.44298		1.18944		1.23801	1.4772		1	1	2	2		3/4
2241	FER	fer (fps/fes related) tyrosine kinase		0.00154		7.23e-09	0.0107		-1.20715		-2.28937	-1.52857		1.02103		1.0996	-2.68085		1	1	1	1		3/4
2242	FES	feline sarcoma oncogene		0.000275	0.0077		0.0462		1.14634	1.33006		-1.66246		1.28433	1.26957		-1.92274		1	1	0	1		3/3
2273	FHL1	four and a half LIM domains 1		5.76e-07		0.00525	0.00983		2.63181		2.27688	8.52962		-1.63645		-2.0087	-2.03231		1	0	1	2		3/3
2295	FOXF2	forkhead box F2		1.38e-06		0.00089	0.00739		2.36694		1.8607	4.11445		-1.07266		1.28132	2.35974		1	0	1	2		3/3
2321	FLT1	fms-related tyrosine kinase 1 (vascular endothelial growth factor/vascular permeability factor receptor)			0.00104	7.62e-08	0.0325			1.08853	2.67975	2.13659			1.04991	1.26011	2.8124		0	1	3	5		3/3
2331	FMOD	fibromodulin		3.81e-09		3.12e-06	0.0155		4.85824		9.35366	14.6789		-1.7897		-2.07522	-1.14014		1	1	1	1		3/4
2355	FOSL2	FOS-like antigen 2		0.000124	1.05e-05	0.000102			-1.51571	-1.80037	-4.56374			-1.1353	1.07276	2.483			2	1	1	4		3/4
2487	FRZB	frizzled-related protein		3.17e-06		1.05e-09	0.0221		1.54146		2.80377	10.8962		1.12737		1.34051	3.22251		1	1	1	5		3/4
2517	FUCA1	fucosidase, alpha-L- 1, tissue		1.81e-10	0.000227	1.9e-07			5.94516	2.5523	3.68672			-1.62809	-2.10345	-1.63717			1	1	1	1		3/4
2530	FUT8	fucosyltransferase 8 (alpha (1,6) fucosyltransferase)		7.49e-11	9.38e-07		0.0046		3.09877	2.54786		12.1533		-1.13318	-1.49462		-1.70026		2	1	0	3		3/3
2531	KDSR	3-ketodihydrosphingosine reductase			0.00216	4.83e-06	0.0179			-1.49625	-2.60296	-1.87897			1.02849	2.19259	2.49802		1	1	1	2		3/4
2532	DARC	Duffy blood group, chemokine receptor		0.00179		0.00276	0.0442		1.44941		1.57881	2.10944		1.0349		1.1874	4.20533		1	0	1	1		3/3
2534	FYN	FYN oncogene related to SRC, FGR, YES		5.52e-05		1.5e-07	0.0299		2.02478		1.9376	3.0217		1.26224		1.67119	1.85817		3	0	1	4		3/3
2549	GAB1	GRB2-associated binding protein 1		0.00476	0.00114	1.51e-08	0.0145		-1.1749	-1.36039	-4.39964	-2.39456		1.00514	1.02201	1.1119	-1.1025		2	1	2	7		4/4
2571	GAD1	glutamate decarboxylase 1 (brain, 67kDa)		6.52e-05		0.00137	0.0297		1.07182		-1.22756	1.1279		1.76495		2.5689	1.90446		3	1	1	1		3/4
2626	GATA4	GATA binding protein 4		2.69e-07	0.00536	9.15e-10	0.0245		1.72426	1.20245	6.01931	1.3194		1.05574	-1.53325	1.161	-2.85161		1	1	2	3		4/4
2683	B4GALT1	UDP-Gal:betaGlcNAc beta 1,4- galactosyltransferase, polypeptide 1			0.00175	8.82e-06	0.00728			-1.17832	-2.10897	1.22281			-1.0916	1.21538	-4.72012		1	1	1	5		3/4
2687	GGT5	gamma-glutamyltransferase 5		0.00442		6.74e-08	0.0119		1.11333		-3.92758	1.18281		1.22156		1.12943	2.56192		1	0	1	1		3/3
2705	GJB1	gap junction protein, beta 1, 32kDa		8.31e-13		1.52e-06	0.0236		3.70526		12.3567	6.60663		1.0625		-1.13924	-5.1886		1	1	1	1		3/4
2717	GLA	galactosidase, alpha		2.84e-06		0.00722	0.00407		1.1278		-1.41117	-1.08128		2.00398		1.63464	2.14506		1	0	1	1		3/3
2752	GLUL	glutamate-ammonia ligase (glutamine synthetase)			0.00342	3.54e-07	0.0249			-2.44965	-3.76118	-3.83217			-2.48276	-1.30331	1.64685		1	1	1	2		3/4
2760	GM2A	GM2 ganglioside activator		0.00925		3.95e-11	0.00276		-1.80769		-4.36505	-3.5694		1.14802		1.20934	4.45907		1	0	1	4		3/3
2762	GMDS	GDP-mannose 4,6-dehydratase		6.58e-05	0.00899	0.00219	0.0406		3.57241	1.83393	-1.6221	6.16291		-1.8007	-1.97881	-1.22623	-6.02202		1	1	1	2		4/4
2766	GMPR	guanosine monophosphate reductase		3.99e-09		9.57e-10	0.0287		1.68011		3.2261	3.08257		-1.05318		-1.67922	-3.23077		1	0	1	1		3/3
2767	GNA11	guanine nucleotide binding protein (G protein), alpha 11 (Gq class)		1.72e-11		0.00159	0.00916		3.54795		1.59742	3.35375		-1.2217		-1.04067	-2.62446		1	0	2	2		3/3
2768	GNA12	guanine nucleotide binding protein (G protein) alpha 12			0.00128	9.57e-10	0.0184			1.72187	2.01058	3.69479			-1.18232	1.16228	1.73105		1	1	1	3		3/4
2791	GNG11	guanine nucleotide binding protein (G protein), gamma 11		0.00402	0.0036	0.000149			2.2084	2.08126	2.09362			1.18417	-1.40611	1.17344			1	1	1	1		3/4
2817	GPC1	glypican 1		1.95e-05		2.2e-07	0.0122		-1.82999		-6.65275	2.52759		1.23259		2.79121	1.14324		1	1	1	1		3/4
2869	GRK5	G protein-coupled receptor kinase 5		1.23e-06		3.87e-08	0.0143		2.77684		2.82888	7.25186		1.11751		-1.07593	1.39851		1	1	1	2		3/4
2872	MKNK2	MAP kinase interacting serine/threonine kinase 2		0.000524	1.19e-05	8.97e-05			1.0877	1.12237	-2.1711			-1.50132	-1.32426	1.0763			2	1	1	1		3/4
2877	GPX2	glutathione peroxidase 2 (gastrointestinal)		1.48e-10		0.000153	0.0336		5.58848		2.03019	2.02005		-1.0626		1.4182	-2.637		1	0	1	1		3/3
2887	GRB10	growth factor receptor-bound protein 10		1.01e-08	0.00979	3.44e-08	0.0406		1.3616	1.04895	1.69088	2.36166		1.35348	1.07333	1.33821	1.16191		1	1	1	1		4/4
2896	GRN	granulin		0.00659		0.00972	0.0485		-1.63582		-1.1815	-3.52616		1.13822		1.51756	1.56395		1	0	1	3		3/3
2907	GRINA	glutamate receptor, ionotropic, N-methyl D-aspartate-associated protein 1 (glutamate binding)		0.00474		2.42e-07	0.00499		-1.02229		-2.60909	-1.97012		1.39716		4.27273	-2.90306		1	0	1	5		3/3
2909	GRLF1	glucocorticoid receptor DNA binding factor 1		0.000225	0.00277		0.00306		1.16613	1.07463		1.51367		1.08418	1.06019		1.17613		2	1	1	4		3/4
2941	GSTA4	glutathione S-transferase alpha 4		0.00324	1.95e-06	4.68e-12	0.00605		-1.63375	-4.77606	-2.90164	-3.18612		-1.26968	-1.91852	-1.25342	3.04101		1	1	1	4		4/4
2982	GUCY1A3	guanylate cyclase 1, soluble, alpha 3		0.0032		9.74e-10	0.0259		1.29066		3.95752	1.73744		1.34406		1.48142	-3.805		1	1	2	6		3/4
2984	GUCY2C	guanylate cyclase 2C (heat stable enterotoxin receptor)		1.4e-06		2.92e-05	0.0462		2.31492		2.70439	14.7852		1.242		-1.40212	-1.23115		1	0	1	3		3/3
3030	HADHA	hydroxyacyl-Coenzyme A dehydrogenase/3-ketoacyl-Coenzyme A thiolase/enoyl-Coenzyme A hydratase (trifunctional protein), alpha subunit		0.0086	0.00263	0.00121			1.42823	1.06537	-1.22426			-1.1484	1.09971	-1.29678			1	2	2	1		3/4
3059	HCLS1	hematopoietic cell-specific Lyn substrate 1		0.00156		0.000287	0.0275		1.06904		1.24826	1.4117		1.73958		1.27695	1.39015		1	0	1	3		3/3
3105	HLA-A	major histocompatibility complex, class I, A		1.02e-05		0.000762	0.0477		1.29426		1.70267	1.15798		1.01721		1.4769	2.45033		2	0	2	4		3/3
3107	HLA-C	major histocompatibility complex, class I, C; major histocompatibility complex, class I, B		4.43e-09		2e-07	0.021		6.64894		2.8786	12.6463		-1.18521		-1.32287	-1.56123		2	0	1	4		3/3
3119	HLA-DQB1	major histocompatibility complex, class II, DQ beta 1; similar to major histocompatibility complex, class II, DQ beta 1		0.00108		6.88e-05	0.0454		-3.50105		-3.31485	-2.55963		-1.05791		6.69657	1.29817		2	0	3	6		3/3
3157	HMGCS1	3-hydroxy-3-methylglutaryl-Coenzyme A synthase 1 (soluble)			8.13e-05	1.07e-06	0.00525			-1.77126	-1.27227	-1.47197			-1.41143	-1.84848	-4.26111		1	1	1	3		3/4
3158	HMGCS2	3-hydroxy-3-methylglutaryl-Coenzyme A synthase 2 (mitochondrial)		5.09e-12	0.000353	4.38e-11	0.048		14.5515	3.26621	18.9474	21.6148		-2.38668	-1.69643	-2.03806	-1.88256		1	1	1	1		4/4
3171	FOXA3	forkhead box A3		6.56e-13		3.93e-09	0.0055		5.55479		12.935	123.57		-1.40676		1.05564	-6.79084		1	0	1	1		3/3
3216	HOXB6	homeobox B6		2.72e-07		5.16e-08	0.0384		2.08086		7.93134	11.2202		-1.16881		-1.336	-2.87697		3	1	1	2		3/4
3217	HOXB7	homeobox B7		1.66e-11	0.000487	9.7e-13	0.0373		3.4027	1.2815	7.60357	9.26076		1.30408	-1.28937	-1.31501	1.23772		1	1	2	2		4/4
3248	HPGD	hydroxyprostaglandin dehydrogenase 15-(NAD)		7.35e-06	0.000795	1.98e-08			4.09324	2.37285	2.30164			-5.28066	-7.82687	-6.1425			1	1	1	1		3/4
3265	HRAS	v-Ha-ras Harvey rat sarcoma viral oncogene homolog		9.36e-05	0.00776	2.49e-08			-1.46599	1.17328	-2.44015			1.01247	3.0605	-1.16315			2	1	1	1		3/4
3291	HSD11B2	hydroxysteroid (11-beta) dehydrogenase 2		9.03e-08	0.000372	1.48e-06			2.79447	1.66218	2.66667			-1.41494	-1.42609	-1.31193			1	1	1	1		3/4
3294	HSD17B2	hydroxysteroid (17-beta) dehydrogenase 2		4.02e-12		1.18e-05	0.00904		15.6879		-1.89818	10.9366		-2.3039		1.01697	-3.89666		1	0	1	1		3/3
3337	DNAJB1	DnaJ (Hsp40) homolog, subfamily B, member 1		2.92e-07		6.11e-07	0.0118		-2.48114		-21.4781	-2.90864		1.08973		6.78114	1.42963		1	1	1	2		3/4
3339	HSPG2	heparan sulfate proteoglycan 2		0.00307		8.02e-07	0.000179		1.06933		2.37383	4.42301		1.09627		-1.05103	1.72188		1	0	1	2		3/3
3373	HYAL1	hyaluronoglucosaminidase 1		4.43e-11		3.59e-08	0.0165		9.00692		6.91704	11.8985		-2.91489		-3.76449	-7.24041		3	0	1	1		3/3
3398	ID2	inhibitor of DNA binding 2, dominant negative helix-loop-helix protein		3.88e-05		1.68e-05	0.0447		3.17268		2.24863	3.23631		-1.30218		1.09295			1	0	1	4		3/3
3399	ID3	inhibitor of DNA binding 3, dominant negative helix-loop-helix protein		2.38e-05		2.67e-07	0.00801		3.83682		2.59929	3.82247		-1.77541		1.15621	1.13215		1	0	1	2		3/3
3431	SP110	SP110 nuclear body protein		0.000401		1.32e-05	0.0193		1.5		1.48489	2		1.31554		1.25717	1.20386		3	0	3	3		3/3
3480	IGF1R	insulin-like growth factor 1 receptor			0.00026	0.00301	0.0205			1.14872	-1.82063	1.60217			1.06964	-1.02895	-6.14773		3	1	1	5		3/4
3490	IGFBP7	insulin-like growth factor binding protein 7		0.000106		3.18e-08	0.0366		2.37074		2.18201	4.82725		2.5131		2.21982	5.0083		1	0	1	1		3/3
3500	IGHV3-11	immunoglobulin heavy constant gamma 1 (G1m marker); immunoglobulin heavy constant mu; immunoglobulin heavy variable 3-7; immunoglobulin heavy constant gamma 3 (G3m marker); immunoglobulin heavy variable 3-11 (gene/pseudogene); immunoglobulin heavy variable 4-31; immunoglobulin heavy locus		5.81e-07		1.03e-06	0.0216		2.27641		8.1728	5.17625		1.99768		-1.50889	1.36841		11	0	7	11		3/3
3535	IGLV2-11	immunoglobulin lambda variable 2-11; immunoglobulin lambda constant 2 (Kern-Oz- marker); immunoglobulin lambda variable 1-44; immunoglobulin lambda constant 1 (Mcg marker); immunoglobulin lambda variable 1-40; immunoglobulin lambda variable 3-21; immunoglobulin lambda locus; immunoglobulin lambda constant 3 (Kern-Oz+ marker)		1.07e-06		4.27e-05	0.0265		2.94737		5.37028	10.2748		-1.21383		1.78377	-2.19603		7	0	1	5		3/3
3553	IL1B	interleukin 1, beta		0.00015	0.000137	0.000678			-1.05694	1.23529	1.26612			5.94206	1.17676	3.8812			1	1	1	2		3/4
3556	IL1RAP	interleukin 1 receptor accessory protein		0.000898		5.65e-09	0.00407		-1.45228		-4.09899	-5.12832		1.21258		1.63434	7.08407		4	0	1	5		3/3
3572	IL6ST	interleukin 6 signal transducer (gp130, oncostatin M receptor)			0.00148	1.82e-06	0.0366			-1.32955	-2.12155	1.11488			-1.38856	1.2619	-5.17031		2	1	2	4		3/4
3606	IL18	interleukin 18 (interferon-gamma-inducing factor)			3.95e-07	6.76e-07	0.0138			-1.49856	-3.26958	-2.98615			-1.20069	-1.35055	1.00277		1	1	1	1		3/4
3638	INSIG1	insulin induced gene 1		6.27e-06		0.000985	0.0471		2.49666		1.58019	-1.31245		-1.1944		-2.33449	-9.576		2	0	1	2		3/3
3673	ITGA2	integrin, alpha 2 (CD49B, alpha 2 subunit of VLA-2 receptor)			0.00379	0.000878	0.0497			1.12218	-1.84882	-2.2915			1.0979	1.33953	-1.26343		1	1	1	3		3/4
3687	ITGAX	integrin, alpha X (complement component 3 receptor 4 subunit)		0.000862	0.00266	2.02e-07			-1.14271	1.15758	1.04282			1.65751	1.10959	2.1404			1	1	1	1		3/4
3705	ITPK1	inositol 1,3,4-triphosphate 5/6 kinase		6.3e-11		4.57e-07	0.0226		2.42088		5.00292	4.56317		-1.06835		-2.02183	-1.4535		1	1	1	3		3/4
3709	ITPR2	inositol 1,4,5-triphosphate receptor, type 2		0.00267		2.01e-08	0.0116		-1.34831		-2.51253	-2.95816		-1.01241		-1.0934	-2.86228		1	0	1	4		3/3
3710	ITPR3	inositol 1,4,5-triphosphate receptor, type 3		1.13e-08		5.97e-07	0.00586		2.75787		2.04113	3.79661		1.22915		1.07297	-1.5874		1	1	1	1		3/4
3764	KCNJ8	potassium inwardly-rectifying channel, subfamily J, member 8		0.00235		6.08e-06	0.0274		1.08395		2.18338	9.549		1.04259		1.05249	6.41533		1	0	1	2		3/3
3772	KCNJ15	potassium inwardly-rectifying channel, subfamily J, member 15			0.00182	0.000503	0.0437			-1.33806	-1.38592	-2.65378			-1.13139	-1.30675	2.17552		2	1	1	2		3/4
3783	KCNN4	potassium intermediate/small conductance calcium-activated channel, subfamily N, member 4		4.48e-09		1.04e-09	0.00619		3.14353		3.72021	9.19606		-1.05031		-1.11606	-2.7222		1	0	1	2		3/3
3801	KIFC3	kinesin family member C3		4.27e-06		2.05e-06	0.0186		-2.71079		-3.20758	-3.02102		2.17986		2.31769	1.93694		2	0	1	1		3/3
3831	KLC1	kinesin light chain 1		4.97e-05	0.00736		0.0101		-1.55732	1.13333		-2.1531		1.19637	1.08451		2.08721		4	1	0	1		3/3
3842	TNPO1	transportin 1		0.000112		2.1e-09	0.0246		1.60921		2.46154	-1.03248		-1.14944		-1.22572	-2.2039		4	0	2	5		3/3
3848	KRT1	keratin 1		0.00109		0.00297	0.0112		-9.08751		-5.73266	-2.39846		-1.09827		-2.90732	-1.49042		1	0	1	1		3/3
3851	KRT4	keratin 4		3.66e-10	4.95e-05	4.48e-05			-28.0387	-53.7766	-2.23053			-2.76336	-5.2809	-1.35634			1	1	1	1		3/4
3856	KRT8P9	keratin 8 pseudogene 9; similar to keratin 8; keratin 8		4.06e-07		0.000654	0.0152		32.5122		1.69304	10.1362		-1.1268		1.48912	-1.79855		1	0	1	4		3/3
3909	LAMA3	laminin, alpha 3		2.99e-05	0.0011	9.3e-07	0.031		2.71963	1.81619	2.86441	2.8624		1.44072	-1.08661	1.24392	1.11819		3	1	1	1		4/4
3910	LAMA4	laminin, alpha 4		0.000254	8.15e-05	4.78e-05	0.0279		1.26426	2.37443	2.23214	5.26546		1.29834	1.13641	2.322	4.65818		1	1	1	2		4/4
3912	LAMB1	laminin, beta 1		7.16e-05		0.00458	0.0494		1.86688		1.05174	4.18		1.32598		2.37757	2.82297		1	0	1	2		3/3
3954	LETM1	leucine zipper-EF-hand containing transmembrane protein 1			0.000515	9.56e-12	0.0197			1.24405	-4.14506	-3.48813			1.08533	-1.00935	3.9314		1	1	3	2		3/4
3956	LGALS1	lectin, galactoside-binding, soluble, 1		0.00114	2.18e-05	2.28e-05	0.0361		2.90756	1.22964	1.9331	2.84047		1.70954	1.09018	1.54827	3.35933		1	1	1	1		4/4
3960	LGALS4	lectin, galactoside-binding, soluble, 4		3.94e-10		5e-11	0.0259		55.1637		32.1295	7.0214		-1.70428		-2.30992	-1.47661		1	1	1	3		3/4
3983	ABLIM1	actin binding LIM protein 1		0.00053		4.89e-11	0.000287		-1.28349		-1.84019	-1.41935		-1.68651		-1.75248	-6.2		4	1	1	4		3/4
3992	FADS1	fatty acid desaturase 1		0.00112	2.01e-06	0.000515			1.07835	1.23023	-1.54918			1.52294	1.26526	1.27732			1	1	3	2		3/4
3995	FADS3	fatty acid desaturase 3		0.00309		0.000412	0.0131		1.01854		1.32099	-4.84052		1.33266		1.49813			1	0	1	1		3/3
4013	VWA5A	von Willebrand factor A domain containing 5A		1.19e-07	0.00422	0.000377			2.53659	1.0999	2.15471			-1.46162	1.04356	-1.99139			3	1	1	1		3/4
4015	LOX	lysyl oxidase			0.00021	0.00127	0.0272			-1.55125	-2.27505	-1.82709			-3.07692	8.99018	3.2139		1	1	1	6		3/4
4017	LOXL2	lysyl oxidase-like 2		0.000575	1.35e-07	0.00384			1.70851	1.1773	1.37661			2.41639	1.10757	2.55649			1	1	1	1		3/4
4037	LRP3	low density lipoprotein receptor-related protein 3		0.000135	0.0075	3.12e-06			1.3878	1.13985	-1.86195			1.31019	1.07288	-1.03357			1	1	1	2		3/4
4048	LTA4H	leukotriene A4 hydrolase		0.00363	0.00955	0.00442	0.0183		-1.75238	-2.49658	-1.82986	-2.32809		1.04643	-1.09476	1.12075	1.34382		1	1	1	1		4/4
4052	LTBP1	latent transforming growth factor beta binding protein 1		0.000616		2.48e-06	0.0365		1.98292		2.43762	7.94018		-1.00393		1.23682	3.93772		1	0	3	3		3/3
4060	LUM	lumican		6.37e-05	0.000263	5.22e-05			4.84752	3.33027	3.21098			1.41405	1.18639	3.57066			1	1	1	2		3/4
4067	LYN	v-yes-1 Yamaguchi sarcoma viral related oncogene homolog		0.000476		8.99e-06	0.0457		2.96635		1.84877	2.62833		1.14019		1.1238	-1.14798		1	0	2	3		3/3
4094	MAF	v-maf musculoaponeurotic fibrosarcoma oncogene homolog (avian)		1.23e-06		0.00131	0.0221		-2.18193		-3.85759	-4.99142		-1.17232		1.75949	2.26609		1	0	1	4		3/3
4126	MANBA	mannosidase, beta A, lysosomal		1.49e-08	0.000122	4.51e-08			1.81662	1.39394	1.90762			-1.13926	-1.15279	-1.39292			1	1	1	1		3/4
4147	MATN2	matrilin 2		2e-05		5.94e-05	0.00629		2.33245		2.48817	6.88571		-1.43974		-2.14259	1.56908		2	0	1	1		3/3
4149	MAX	MYC associated factor X		0.00545	0.000227	0.000443	0.0114		-1.21951	-1.60933	-1.67962	-3.1443		-1.06263	-1.24727	-1.11606	-1.975		4	1	1	2		4/4
4189	DNAJB9	DnaJ (Hsp40) homolog, subfamily B, member 9		4e-05		0.00361	0.0427		1.56742		1.3317	1.70197		-1.01179		-1.39037	1.34916		1	0	1	2		3/3
4200	ME2	malic enzyme 2, NAD(+)-dependent, mitochondrial		2.11e-07		0.000339	0.0477		1.70135		1.84435	3.13431		-1.03707		-1.25181	1.3228		1	0	1	1		3/3
4211	MEIS1	Meis homeobox 1		0.00698		1.69e-05	0.0354		-1.51738		-4.79857	-1.92669		-1.19123		2.10143	-3.05747		1	0	1	2		3/3
4233	MET	met proto-oncogene (hepatocyte growth factor receptor)			0.00638	0.00191	0.0228			1.38133	2.10778	3.72465			-1.01533	1.05049			1	1	2	2		3/4
4300	MLLT3	myeloid/lymphoid or mixed-lineage leukemia (trithorax homolog, Drosophila); translocated to, 3		1.95e-08		3.58e-07	0.00719		2.34638		2.25517	2.64697		-1.61416		-1.82682	-2.4883		1	0	1	1		3/3
4301	MLLT4	similar to Afadin (Protein AF-6); myeloid/lymphoid or mixed-lineage leukemia (trithorax homolog, Drosophila); translocated to, 4		0.000494		3.67e-07	0.0077		-1.23196		-7.80842	-3.71103		-1.00103		3.36	1.1635		2	1	3	5		3/4
4439	MSH5	mutS homolog 5 (E. coli)		0.00736	0.00157		0.046		-1.06825	1.04339		2.35646		1.01758	1.10348		-1.0063		2	1	1	1		3/4
4486	MST1R	macrophage stimulating 1 receptor (c-met-related tyrosine kinase)		1.06e-08		3.68e-08	0.0213		2.11463		4.03522	7.40643		-1.13891		-1.60475	-6.97153		1	1	1	2		3/4
4488	MSX2	msh homeobox 2		0.00562		8.2e-06	0.049		1.20372		3.43739	4.24787		1.0455		1.07784	1.34526		1	0	1	2		3/3
4520	MTF1	metal-regulatory transcription factor 1		7.42e-06		2.27e-11	0.0138		-1.46772		-2.52673	-2.19027		1.05079		1.10561	1.46934		1	1	1	5		3/4
4584	MUC3B	mucin 3B, cell surface associated; similar to Mucin-3A precursor (Intestinal mucin-3A); mucin 3A, cell surface associated; similar to mucin 3		1.44e-07		1.65e-08	0.0476		12.0118		17.7296	11.1895		2.01182		-1.52379	-2.30052		3	0	1	1		3/3
4588	MUC6	mucin 6, oligomeric mucus/gel-forming		1.64e-11		6.11e-05	0.043		43.7979		26.5559	3.63169		-13.1211		-4.16392	-11.631		2	0	1	1		3/3
4595	MUTYH	mutY homolog (E. coli)		4.85e-07	0.00181		0.0274		1.53777	1.15815		2.01609		1.26311	1.09245		-2.59908		1	1	1	1		3/4
4616	GADD45B	growth arrest and DNA-damage-inducible, beta		0.000482	0.00608	4.17e-05			-1.98148	1.15102	-2.96509			1.41481	1.02691	1.11347			1	1	1	3		3/4
4640	MYO1A	myosin IA		2.73e-11		5.27e-06	0.0365		11.0437		14.5668	11.4526		-2.25527		-2.92713	-5.1471		1	1	1	1		3/4
4651	MYO10	myosin X		1.95e-08	0.00522		0.0138		2.41341	1.72436		3.19437		1.06327	-1.24785		1.53909		1	1	1	4		3/4
4670	HNRNPM	heterogeneous nuclear ribonucleoprotein M		0.00212	0.000332	0.00199			1.1066	-1.36877	-1.26452			1.34031	-1.08547	-1.12354			2	1	1	1		3/4
4690	NCK1	NCK adaptor protein 1		0.000123	0.000634	0.000128	0.013		-1.73218	-1.99628	1.14734	-2.56553		1.07471	-1.10494	-2.59565	1.59466		1	1	1	2		4/4
4739	NEDD9	neural precursor cell expressed, developmentally down-regulated 9		3.76e-08	0.000112	1.09e-06			1.96744	1.49376	2.94006			1.05043	-1.18071	-1.2328			3	1	1	1		3/4
4756	NEO1	neogenin homolog 1 (chicken)		5.2e-07	7.23e-07	0.000387			1.39511	-1.08369	-1.80874			1.20572	-1.21671	-1.12615			1	2	2	2		3/4
4776	NFATC4	nuclear factor of activated T-cells, cytoplasmic, calcineurin-dependent 4			0.000638	6.35e-05	0.039			1.12121	1.56057	5.26615			1.11351	-1.07073	1.10721		1	1	1	1		3/4
4780	NFE2L2	nuclear factor (erythroid-derived 2)-like 2		0.00114		1.31e-10	0.0169		-1.73029		-2.56237	-2.62077		-1.17608		-1.43988	1.83747		1	1	1	2		3/4
4792	NFKBIA	nuclear factor of kappa light polypeptide gene enhancer in B-cells inhibitor, alpha		0.00103	0.00656	1.63e-08			-2.00262	-2.45909	-6.82308			1.53866	1.425	5.44423			1	1	2	1		3/4
4853	NOTCH2	Notch homolog 2 (Drosophila)		0.00786	0.000304	0.000174			-1.21257	-2.66495	-1.65279			1.04293	-1.06301	-1.04787			1	1	1	2		3/4
4854	NOTCH3	Notch homolog 3 (Drosophila)		3.85e-05		8.42e-08	0.026		-1.52846		-2.0065	-2.51751		1.12889		1.04681	2.2179		1	0	2	2		3/3
4891	SLC11A2	solute carrier family 11 (proton-coupled divalent metal ion transporters), member 2		0.00295		0.000123	0.0322		-1.69		-2.67009	-3.05666		1.03556		1.40436	1.18697		1	1	1	4		3/4
4907	NT5E	5'-nucleotidase, ecto (CD73)		3.08e-07	6.89e-05	2.78e-06	0.0319		3.03221	4.30129	10.3836	3.86227		1.05736	-1.12683	1.65172	-1.86249		1	1	1	3		4/4
4925	NUCB2	nucleobindin 2		0.00219		1.17e-08	0.00455		-1.48531		-1.40462	-2.05102		-1.69887		-2.24675	-2.12121		1	1	1	2		3/4
4929	NR4A2	nuclear receptor subfamily 4, group A, member 2		0.00355	0.00918	0.000737			1.06904	1.4902	3.13357			1.37538	1.35734	-2.19008			1	1	1	1		3/4
4953	ODC1	ornithine decarboxylase 1		1.24e-05		6.42e-06	0.0345		1.98723		4.74603	3.31115		1.89348		-1.30057	1.06567		1	1	5	1		3/4
5002	SLC22A18	solute carrier family 22, member 18		2.62e-07	4.81e-06	0.00049			4.91793	2.05469	2.38867			-1.91023	-1.87022	-2.36846			3	1	2	1		3/4
5010	CLDN11	claudin 11		6.34e-06		0.0008	0.0288		1.70482		1.70228	3.57283		-1.26339		-1.5584	1.08379		1	0	1	1		3/3
5033	P4HA1	prolyl 4-hydroxylase, alpha polypeptide I		1.01e-05		1.59e-07	0.0174		1.92441		3.2153	1.74366		1.18903		-2.94144	2.44157		1	1	1	1		3/4
5058	PAK1	p21 protein (Cdc42/Rac)-activated kinase 1		6.6e-09	0.00513	0.00638			2.28943	1.35933	1.68986			-1.07137	-1.5827	-1.43218			1	1	1	2		3/4
5167	ENPP1	ectonucleotide pyrophosphatase/phosphodiesterase 1		1.51e-08		6.2e-07	0.0383		1.61401		3.0755	2.50898		1.08366		-1.92253	-1.207		1	0	1	3		3/3
5226	PGD	phosphogluconate dehydrogenase		0.00354	0.00747	3.87e-08	0.00935		-2.47917	-1.74517	-2.84117	-4.06087		-1.10412	-1.20465	-1.31276	-1.07981		1	1	1	1		4/4
5238	PGM3	phosphoglucomutase 3		3.12e-05		6.51e-07	0.0445		1.74194		1.92367	2.06983		-1.08271		-1.1896	-2.55012		1	0	1	4		3/3
5264	PHYH	phytanoyl-CoA 2-hydroxylase		3.27e-11		2.72e-10	0.0359		3.74596		4.151	13.5099		-1.49218		-1.40312	-2.63491		1	1	1	3		3/4
5266	PI3	peptidase inhibitor 3, skin-derived		7.75e-07	1.8e-05		0.032		-11.239	-2.79167		-1.55794		2.53659	-1.64259		-7.5875		1	1	0	1		3/3
5274	SERPINI1	serpin peptidase inhibitor, clade I (neuroserpin), member 1		0.0011	0.00805	0.00017			1.05857	1.14585	1.70411			1.07143	1.01498	1.2291			1	1	1	1		3/4
5284	PIGR	polymeric immunoglobulin receptor		9.33e-11	0.00945	7.12e-08			76.9686	1.14477	10.8067			-3.35714	1.04523	-1.02004			1	1	1	1		3/4
5292	PIM1	pim-1 oncogene		2.83e-06	0.000145	5.93e-05	0.0275		-3.6965	-4.52036	-8.02752	-10.1473		1.07133	1.02715	1.90275	1.04651		1	1	1	2		4/4
5326	LOC152845	pleiomorphic adenoma gene-like 2; similar to pleiomorphic adenoma gene-like 2		0.00272		0.00356	0.0457		-1.15094		-1.70056	-1.43226		1.73585		1.25028	2.78452		1	0	1	2		3/3
5328	PLAU	plasminogen activator, urokinase		2.42e-05	0.00469	0.000353			-1.43743	1.30781	-1.0639			4.13433	3.53444	4.88179			1	1	2	1		3/4
5332	PLCB4	phospholipase C, beta 4		4.07e-11		1.77e-08	0.00466		3.59838		4.17957	19.731		-1.38162		-1.39703	-1.91389		1	0	2	6		3/3
5337	PLD1	phospholipase D1, phosphatidylcholine-specific		3.3e-05		1.97e-06	0.00185		-1.51543		-2.79016	-2.46633		-1.17676		-1.50419	-3.31405		1	0	1	2		3/3
5338	PLD2	phospholipase D2		3.03e-06	0.000294	1.42e-06			-1.47117	-1.94521	-4.28255			-1.10307	-1.16136	-1.04206			1	1	1	1		3/4
5351	PLOD1	procollagen-lysine 1, 2-oxoglutarate 5-dioxygenase 1		3.23e-05	0.000542	0.0015			1.88802	1.27517	-1.1299			1.35585	1.15324	2.5252			1	1	1	1		3/4
5355	PLP2	proteolipid protein 2 (colonic epithelium-enriched)		2.18e-05	0.000644	1.04e-08			-1.73333	-3.03909	-2.78409			1.06415	-1.25306	1.38312			1	1	1	1		3/4
5372	PMM1	phosphomannomutase 1		0.00202		3.49e-07	0.032		-1.47409		-2.43084	-3.09853		-1.36566		-1.42857	-1.88538		1	0	1	1		3/3
5412	UBL3	ubiquitin-like 3		0.00958		0.00328	0.00169		-1.2645		-2.02968	-3.54545		-1.49559		-1.1133	-4.1691		1	0	1	3		3/3
5420	PODXL	podocalyxin-like		1.88e-06		1.23e-08	0.0368		1.1918		1.85565	3.32106		1.42791		1.86879	2.75263		1	0	1	1		3/3
5465	PPARA	peroxisome proliferator-activated receptor alpha		0.00144	0.000517		0.00725		1.16234	1.215		1.29614		1.08101	-1.02101		-4.48736		2	1	2	7		3/4
5493	PPL	periplakin		6.94e-10		4.35e-09	0.0165		-11.7566		-5.55723	-5.51402		-1.28135		-1.33694	1.33645		1	0	1	1		3/3
5511	PPP1R8	protein phosphatase 1, regulatory (inhibitor) subunit 8		0.00857	0.00267		0.0169		1.05104	-1.41597		-1.09782		1.09415	-1.31978		1.52517		2	1	1	1		3/4
5567	PRKACB	protein kinase, cAMP-dependent, catalytic, beta		0.00015		0.000328	0.0094		2.74638		2.37874	1.67005		-1.94758		-2.51481	-5.37685		3	1	1	2		3/4
5594	MAPK1	mitogen-activated protein kinase 1		0.00502		3.8e-05	0.0481		-1.44032		-1.60843	1.28354		-1.02422		6.46265	-2.45243		3	0	1	4		3/3
5634	PRPS2	phosphoribosyl pyrophosphate synthetase 2		0.000748	0.00454	0.000437			1.41228	-1.47665	1.3613			1.16948	1.05632	1.06491			1	1	1	1		3/4
5688	PSMA7	proteasome (prosome, macropain) subunit, alpha type, 7		0.000704		9.99e-06	0.0476		1.056		-1.39528	2.78401		1.45346		1.90846	-2.70446		2	0	1	3		3/3
5698	PSMB9	proteasome (prosome, macropain) subunit, beta type, 9 (large multifunctional peptidase 2)		4.6e-06	0.00912	2.43e-09			3.06842	1.78751	2.99213			1.50772	1.33277	1.11842			1	1	1	1		3/4
5721	PSME2	proteasome (prosome, macropain) activator subunit 2 (PA28 beta)		0.000583		0.00239	0.0438		2.00355		1.46843	1.36493		1.23894		-1.01107	1.33383		2	0	1	2		3/3
5732	PTGER2	prostaglandin E receptor 2 (subtype EP2), 53kDa		3.72e-07		4.14e-08	0.048		1.59884		5.75325	11.6125		-1.30085		-1.10089	-1.30046		1	0	1	1		3/3
5774	PTPN3	protein tyrosine phosphatase, non-receptor type 3			0.000304	1.24e-06	0.0173			-1.79688	-2.43663	-2.75758			-1.64571	-1.27176	-1.54688		2	1	1	2		3/4
5777	PTPN6	protein tyrosine phosphatase, non-receptor type 6		0.000484	0.000502	0.00735			1.25261	1.24763	1.35757			1.26087	1.07855	1.21247			3	1	1	1		3/4
5783	PTPN13	protein tyrosine phosphatase, non-receptor type 13 (APO-1/CD95 (Fas)-associated phosphatase)		1.75e-05		6.51e-07	0.00718		-2.18379		-2.42533	-5.05233		1.05936		1.13733	2.59302		1	0	1	3		3/3
5795	PTPRJ	protein tyrosine phosphatase, receptor type, J		7.99e-10		3.26e-07	0.0123		1.72146		3.50254	10.5789		1.17683		-1.0197	1.08955		2	0	2	3		3/3
5799	PTPRN2	protein tyrosine phosphatase, receptor type, N polypeptide 2		1.56e-10	1.25e-05	3.1e-06			5.02213	1.29191	4.51975			-2.10811	-1.05901	-2.54222			1	1	1	1		3/4
5827	PXMP2	hypothetical LOC100129532; peroxisomal membrane protein 2, 22kDa		2.38e-09		1.08e-05	0.0183		2.87731		2.39663	1.98449		-1.51504		-1.71325	-3.12806		1	0	1	1		3/3
5831	PYCR1	pyrroline-5-carboxylate reductase 1		2.19e-13	0.00837	2.98e-10			3.91798	1.28991	3.23651			1.16506	-1.05444	1.17308			3	1	1	1		3/4
5836	PYGL	phosphorylase, glycogen, liver		3.22e-06		0.00111	0.00552		-3.57066		-2.8977	-6.76296		1.60107		1.26982	5.80741		1	1	1	4		3/4
5868	RAB5A	RAB5A, member RAS oncogene family			1.05e-05	0.003	0.00398			-1.96444	-1.78499	-1.7			-1.20403	-1.0715	-1.42191		1	1	1	2		3/4
5870	LOC150786	RAB6C, member RAS oncogene family; RAB6A, member RAS oncogene family; hypothetical LOC100130819; RAB6C-like		0.000822		1.49e-08	0.00907		-1.19211		-4.6907	-2.10069		1.01558		2.67907	-1.06326		3	0	4	8		3/3
5873	RAB27A	RAB27A, member RAS oncogene family		2.53e-08		2.81e-05	0.00499		3.6906		2.14505	1.81013		-2.31652		-2.23665	-2.53615		4	1	1	8		3/4
5886	RAD23A	RAD23 homolog A (S. cerevisiae)		3.96e-05	0.000386	1.8e-06			1.17254	1.34184	2.05212			1.45699	-1.93684	-1.35657			1	1	1	1		3/4
5916	RARG	retinoic acid receptor, gamma		8.69e-07	0.00279	0.000575			-2.73739	1.1403	-2.31311			1.03493	1.16598	1.07584			1	1	1	1		3/4
5918	RARRES1	retinoic acid receptor responder (tazarotene induced) 1		3.01e-08		3.36e-06	0.0329		2.08462		8.78437	8.46395		2.22325		1.92176	7.59444		1	1	1	2		3/4
5996	RGS1	regulator of G-protein signaling 1		0.00698	0.00306	0.000186			1.00203	1.11644	1.0266			1.47614	1.16564	3.05829			1	1	1	1		3/4
5997	RGS2	regulator of G-protein signaling 2, 24kDa		0.00169		1.51e-06	0.0188		3.68541		9.78864	4.26119		-1.37995		-3.70729	-1.11387		1	1	1	1		3/4
5998	RGS3	regulator of G-protein signaling 3		0.000208		3.47e-07	0.022		2.31034		1.86733	2.99674		1.47948		1.52309	2.80621		5	1	1	1		3/4
6002	RGS12	regulator of G-protein signaling 12		1.8e-11	0.00346	0.00344			-2.73153	1.10832	-1.85319			-1.12155	-1.02315	-1.10718			5	1	2	3		3/4
6004	RGS16	regulator of G-protein signaling 16		6.17e-07	9.59e-05	6.95e-06			1.16648	1.30792	1.9417			1.48851	2.1388	1.31101			1	1	1	2		3/4
6016	RIT1	Ras-like without CAAX 1		0.00048	1.05e-05	2.54e-10	0.00256		-1.83671	-2.27907	-2.82189	-3.06051		1.17848	-1.18349	-1.11414	1.84395		1	1	1	1		4/4
6035	RNASE1	ribonuclease, RNase A family, 1 (pancreatic)		7.99e-10		3.4e-09	0.0158		15.1524		6.10914	14.6041		-2.93542		-1.13217	-1.77877		2	1	1	1		3/4
6125	RPL5P34	ribosomal protein L5 pseudogene 34; ribosomal protein L5 pseudogene 1; ribosomal protein L5		0.00671	0.00998		0.0177		1.15393	-1.65379		5.95482		-1.07094	-1.49224		-1.38419		4	1	2	3		3/4
6236	RRAD	Ras-related associated with diabetes		0.000548	0.00459	8.16e-07			-2.56647	-1.66316	-2.36131			1.08902	-1.14458	-1.11081			1	1	1	1		3/4
6238	RRBP1	ribosome binding protein 1 homolog 180kDa (dog)		1.66e-06		3.85e-05	0.0312		1.96899		-3.14564	2.86023		1.34173		5.65641	-1.25773		1	0	2	5		3/3
6249	CLIP1	CAP-GLY domain containing linker protein 1		0.00568	0.00126	0.000197			-1.15472	-3.87077	-6.06196			1.00208	-1.12457	2.80723			2	1	1	2		3/4
6278	S100A7	S100 calcium binding protein A7		0.00479		0.00456	0.0377		-10.9819		-1.50136	-1.47391		1.86353		2.44158	1.94076		1	0	1	1		3/3
6296	ACSM3	acyl-CoA synthetase medium-chain family member 3		2.52e-05		0.000399	0.0472		1.18701		2.80724	3.88669		1.11038		-1.792	-2.22669		2	0	2	2		3/3
6355	CCL8	chemokine (C-C motif) ligand 8		0.00407		2.75e-06	0.0215		1.02222		2.15458	1.83477		1.47628		1.76262	1.30921		1	0	1	1		3/3
6359	CCL14	chemokine (C-C motif) ligand 14; chemokine (C-C motif) ligand 15		1.18e-05		5.48e-08	0.0314		1.45154		19.7962	4.3686		-1.21224		-3.27967	-3.35013		3	0	1	1		3/3
6362	CCL18	chemokine (C-C motif) ligand 18 (pulmonary and activation-regulated)		0.000916	0.00331	1.1e-06			2.04823	4.34923	4.58631			2.48901	1.25985	1.73199			1	1	1	1		3/4
6386	SDCBP	syndecan binding protein (syntenin)		1.84e-06	0.00608	7.18e-06			2.52373	1.85896	2.22222			-1.08953	-1.6348	-1.31868			2	1	1	2		3/4
6387	CXCL12	chemokine (C-X-C motif) ligand 12 (stromal cell-derived factor 1)		6.85e-06	3.39e-05	0.00283			2.12738	-1.28437	1.20261			-1.73664	-1.02345	1.98913			2	1	1	3		3/4
6400	SEL1L	sel-1 suppressor of lin-12-like (C. elegans)		0.000378		2.56e-05	0.00527		1.19521		1.7745	1.901		1.01719		-1.1779			1	1	1	4		3/4
6402	SELL	selectin L		0.00131	4.75e-05	0.000381			-1.08464	1.13807	-1.87437			1.4953	1.11062	6.19765			2	1	1	1		3/4
6430	SFRS5	splicing factor, arginine/serine-rich 5		9.13e-05		0.00217	0.00383		-2.49075		-1.64741	-1.58722		1.11467		1.09316	-5.96292		1	1	1	3		3/4
6464	SHC1	SHC (Src homology 2 domain containing) transforming protein 1		0.000799	0.00381	0.0021			1.60028	1.23957	1.11392			1.20743	-1.00948	1.54855			3	1	2	2		3/4
6493	SIM2	single-minded homolog 2 (Drosophila)		0.00776		1.88e-07	0.00569		1.10929		-1.90175	-1.12085		-1.37008		-2.13085	-4.97248		4	0	1	1		3/3
6507	SLC1A3	solute carrier family 1 (glial high affinity glutamate transporter), member 3			0.00481	4.2e-05	0.00684			1.1381	-4.39105	-3.69256			1.1222	1.68482	2.8123		1	1	1	2		3/4
6513	SLC2A1	solute carrier family 2 (facilitated glucose transporter), member 1		0.00357		5.81e-12	0.0226		-1.37808		-3.02516	-3.94444		1.35682		2.03983	2.92361		1	0	1	4		3/3
6522	SLC4A2	solute carrier family 4, anion exchanger, member 2 (erythrocyte membrane protein band 3-like 1)		2.61e-08	0.00462	4.54e-06	0.0257		1.46561	1.28	1.84922	2.02359		1.37274	1.10442	1.36846	1.1839		1	1	1	2		4/4
6525	SMTN	smoothelin		2.21e-05	0.00737		0.0406		1.43875	1.12963		2.74508		1.15117	1.14754		1.75803		2	1	1	2		3/4
6548	SLC9A1	solute carrier family 9 (sodium/hydrogen exchanger), member 1		1.59e-09		0.000275	0.0342		6.7106		2.8143	4.50193		-2.25409		-1.6289	-3.12182		1	0	1	1		3/3
6590	SLPI	secretory leukocyte peptidase inhibitor			0.00016	6.35e-05	0.00913			-6.66667	-2.41231	-4.25368			-2.28018	-1.16071	2.14338		1	1	1	4		3/4
6591	SNAI2	snail homolog 2 (Drosophila)			0.000203	0.0037	0.0279			-2.16	-2.14671	-2.19284			-1.32794	3.10778	4.03579		1	1	1	2		3/4
6596	HLTF	helicase-like transcription factor		9.57e-07		0.00114	0.0407		1.29608		1.25148	2.41515		1.43853		1.4783	1.26558		2	1	1	1		3/4
6608	SMO	smoothened homolog (Drosophila)		0.00638	0.000424	0.000345			-1.29846	-1.15714	-1.60653			1.00308	-1.11554	-1.42298			1	1	1	2		3/4
6649	SOD3	superoxide dismutase 3, extracellular		4.52e-09		0.00205	0.0106		5.11348		2.85749	8.70578		-1.5		-1.63201	1.09118		1	0	1	2		3/3
6659	SOX4	SRY (sex determining region Y)-box 4		1.98e-08		0.00354	0.003		2.08021		1.8232	1.96335		1.47901		-1.85442	2.16356		1	0	1	3		3/3
6667	SP1	Sp1 transcription factor		0.00624		4.44e-05	0.017		1.13134		-2.35974	-1.28928		1.3778		1.28182	-1.97052		1	0	1	3		3/3
6678	SPARC	secreted protein, acidic, cysteine-rich (osteonectin)		0.000702		1.54e-07	0.0365		2.67734		2.01437	4.29288		2.53818		1.87768	6.46546		1	0	1	3		3/3
6690	SPINK1	serine peptidase inhibitor, Kazal type 1		1.41e-10		7.83e-07	0.0253		41.5488		22.4408	26.4172		-1.29809		1.59326	-1.92086		1	0	1	2		3/3
6711	SPTBN1	spectrin, beta, non-erythrocytic 1		6.15e-08	0.00831	1.39e-07	0.0107		1.29849	1.12802	3.39902	6.6607		1.06977	1.07507	-1.39692	1.26924		3	1	3	7		4/4
6731	SRP72	signal recognition particle 72kDa			0.00814	3.58e-07	0.0115			-1.25864	-4.40105	-1.59582			-1.29077	4.39405	-3.97073		1	1	2	5		3/4
6744	SSFA2	sperm specific antigen 2		0.00108		1.11e-05	0.037		1.2226		2.57838	3.31546		1.01664		-1.40191	-1.25353		1	1	1	3		3/4
6745	SSR1	signal sequence receptor, alpha		0.00739		0.000804	0.013		1.3544		-3.01833	-1.28408		1.04392		3.25866	-1.7253		4	0	2	3		3/3
6747	SSR3	signal sequence receptor, gamma (translocon-associated protein gamma)		0.00256	0.00185		0.0384		1.26029	1.25826		1.81713		-1.02441	-1.16713		-1.66844		1	1	1	3		3/4
6764	ST5	suppression of tumorigenicity 5			0.00284	0.000662	0.0336			-1.10703	-1.50932	-1.00225			-1.16789	-1.16192	2.36078		2	1	1	2		3/4
6772	STAT1	signal transducer and activator of transcription 1, 91kDa		0.000506		1.69e-05	0.0442		1.4229		-3.89723	-1.07798		2.06867		3.68707	3.66324		3	0	2	3		3/3
6789	STK4	serine/threonine kinase 4		7.49e-05	0.00881	2.53e-07			1.02407	1.11059	2.04841			1.75534	1.11983	-1.05167			1	1	2	5		3/4
6809	STX3	syntaxin 3		3.96e-09	0.00211	3.21e-09	0.0104		2.5233	1.51544	2.89332	4.08511		-1.14008	-1.54985	-1.7516	-1.99653		1	1	1	2		4/4
6819	SULT1C2	sulfotransferase family, cytosolic, 1C, member 2		3.03e-10		2.43e-09	0.00864		5.21505		58.5358	28.3285		-2.24329		-2.82556	-13.3404		3	1	1	2		3/4
6928	HNF1B	HNF1 homeobox B		6.24e-13		1.51e-08	0.0235		2.16163		4.6805	3.08333		1.12325		-1.37673			3	0	1	3		3/3
6945	MLX	MAX-like protein X		1.46e-06	0.0044	0.00167			1.44861	1.08743	1.04472			-1.08318	1.0804	-1.3988			2	1	1	1		3/4
6988	TCTA	T-cell leukemia translocation altered gene		2.73e-07		0.00131	0.0435		1.88102		1.95229	1.97582		-1.19856		-1.88665	-1.11992		1	1	1	1		3/4
7018	TF	transferrin		0.00073		4.63e-05	0.0382		-2.92103		-4.15287	7.07973		-1.35947		-1.03842	-1.11413		2	0	1	3		3/3
7026	NR2F2	nuclear receptor subfamily 2, group F, member 2		3.82e-09		1.44e-07	0.0285		2.94487		3.156	7.8465		1.01549		1.24778	-1.81146		1	0	1	2		3/3
7031	TFF1	trefoil factor 1		1.74e-08		2.54e-10	0.00486		123.669		53.7395	7.39885		-5.68264		-3.15413	-5.11478		1	0	1	2		3/3
7035	TFPI	tissue factor pathway inhibitor (lipoprotein-associated coagulation inhibitor)		2.35e-09	0.000203	1.47e-07			2.31167	1.84824	2.06119			1.4088	1.06417	1.01303			1	1	2	3		3/4
7053	TGM3	transglutaminase 3 (E polypeptide, protein-glutamine-gamma-glutamyltransferase)		6.3e-11		1.43e-06	0.029		-30.5633		-6.28722	-2.81179		-1.98992		-1.25692	-1.18231		1	0	1	1		3/3
7056	THBD	thrombomodulin		0.000124		5.56e-07	0.012		-2.31169		-2.73016	-3.20042		1.52468		2.18166	6.9789		1	0	1	2		3/3
7057	THBS1	thrombospondin 1		0.00311		0.000419	0.0274		1.13097		2.44753	3.78271		2.1737		1.24212	6.84991		1	1	2	3		3/4
7076	TIMP1	TIMP metallopeptidase inhibitor 1			0.00882	1.27e-08	0.0321			1.19678	2.79925	2.31142			1.16047	-1.01359	4.04481		1	1	1	3		3/4
7095	SEC62	SEC62 homolog (S. cerevisiae)		2.15e-06		2.49e-07	0.0385		1.8609		1.71805	3.36772		1.2201		-1.03739	-2.80596		2	1	1	2		3/4
7105	TSPAN6	tetraspanin 6		0.00382		7.66e-10	0.00756		-1.93142		-3.44859	-4.85818		1.02494		-1.30523	1.87636		1	0	1	1		3/3
7165	TPD52L2	tumor protein D52-like 2		0.000305	0.000711	3.14e-08			-1.58493	-1.96398	-2.71148			1.69349	-1.11848	1.96721			2	1	2	2		3/4
7168	TPM1	tropomyosin 1 (alpha)		2.28e-08	0.00144	2.81e-05	0.00335		1.57289	-1.12838	2.82654	6.15206		-1.10116	-1.14877	-1.4814	-2.90166		1	1	1	4		4/4
7172	TPMT	thiopurine S-methyltransferase		6.85e-05		0.000286	0.0317		1.46372		2.36246	3.56471		-1.15681		-1.88793	-3.23718		2	1	1	4		3/4
7181	NR2C1	nuclear receptor subfamily 2, group C, member 1		6.8e-05		3.31e-05	0.0235		1.39027		1.64447	2.66631		-1.07149		-1.22824	-1.39118		1	0	1	1		3/3
7184	HSP90B1	heat shock protein 90kDa beta (Grp94), member 1		6.58e-06	0.00916	7.65e-05			2.06533	1.10282	2.05315			1.18005	1.15924	1.03747			1	1	1	1		3/4
7227	TRPS1	trichorhinophalangeal syndrome I			0.00316	5.16e-08	0.0078			-1.37864	-3.26819	-2.66416			-1.00698	1.17974	1.38847		1	1	1	4		3/4
7263	TST	thiosulfate sulfurtransferase (rhodanese)		2.68e-06		0.000378	0.0254		2.38881		-4.12024	1.30015		-1.86659		-2.46698	-3.21739		1	1	1	1		3/4
7326	UBE2G1	ubiquitin-conjugating enzyme E2G 1 (UBC7 homolog, yeast)		0.00212		4.54e-08	0.0185		-2.27982		-2.33271	-3.18519		1.07798		2.22862	1.42593		2	0	1	2		3/3
7327	UBE2G2	ubiquitin-conjugating enzyme E2G 2 (UBC7 homolog, yeast)		0.000192	0.00133	0.00478	0.038		1.20525	1.28034	-1.55088	1.69186		1.34153	1.19463	1.54971	-1.09605		3	1	1	4		4/4
7405	UVRAG	UV radiation resistance associated gene		2.9e-08		3.14e-06	0.0119		1.26447		1.76078	1.87487		1.09695		-1.13959	-1.01475		1	0	1	1		3/3
7429	VIL1	villin 1			1.77e-05	1.83e-09	0.0325			5.56046	21.1727	34.1055			-1.64089	-2.06703	-3.89924		1	1	1	1		3/4
7461	CLIP2	CAP-GLY domain containing linker protein 2		3.05e-07	2.7e-05		0.0428		2.48257	1.12513		1.25872		1.17295	1.05961		1.74235		2	1	1	1		3/4
7504	XK	X-linked Kx blood group (McLeod syndrome)		7.22e-07		2.54e-06	0.0248		2.03949		2.93915	2.52537		-1.49766		-1.95547	-3.03756		1	0	1	1		3/3
7511	XPNPEP1	X-prolyl aminopeptidase (aminopeptidase P) 1, soluble		6.21e-07		0.000817	0.0493		2.17304		1.69151	2.23336		1.0827		-1.71459	-1.18532		1	1	1	1		3/4
7520	XRCC5	X-ray repair complementing defective repair in Chinese hamster cells 5 (double-strand-break rejoining)		0.000132	0.001	0.00623			1.21172	-1.24096	-1.31082			1.37315	-1.42123	-1.17245			1	1	1	1		3/4
7533	YWHAH	tyrosine 3-monooxygenase/tryptophan 5-monooxygenase activation protein, eta polypeptide		1.98e-08	0.000151	0.000206			3.29369	2.47177	1.85873			-1.24267	-1.71229	-1.08752			1	1	1	2		3/4
7707	ZNF148	zinc finger protein 148		4.69e-05		0.000129	0.0401		1.63398		-1.3758	-1.26065		1.08453		-1.06803	-1.80917		1	0	1	5		3/3
7726	TRIM26	tripartite motif-containing 26		0.00412		0.00366	0.0251		1.16411		-1.28177	-1.55267		1.06955		-1.07864	-3.3172		2	0	2	8		3/3
7738	ZNF184	zinc finger protein 184		0.000214	0.00933	0.000954			1.33731	-1.23834	1.90534			1.07308	-1.17863	-1.45203			1	1	1	2		3/4
7746	ZNF193	zinc finger protein 193		0.00246	0.00146	0.00783			1.19139	1.05331	1.39547			1.07414	1.07216	-1.2109			1	1	1	1		3/4
7763	ZFAND5	similar to zinc finger, AN1-type domain 5; zinc finger, AN1-type domain 5			0.00943	2.45e-06	0.00692			-2.4596	-2.32378	-5.17333			-1.35616	-1.16153	1.29333		2	1	1	2		3/4
7799	PRDM2	PR domain containing 2, with ZNF domain		0.00281		5.97e-07	0.015		-1.32369		-2.45938	-4.98842		1.06563		1.48449			3	1	2	2		3/4
7837	PXDN	peroxidasin homolog (Drosophila)		0.000561		2.29e-05	0.0107		1.4502		2.55632	14.3417		2.15385		1.73471	7.13379		1	1	1	3		3/4
7841	MOGS	mannosyl-oligosaccharide glucosidase		2.41e-05		0.00107	0.0261		1.24563		1.3044	1.79317		1.13178		1.05223	1.25926		1	1	1	1		3/4
7855	FZD5	frizzled homolog 5 (Drosophila)		1.55e-12		1.57e-06	0.0262		2.2948		3.0724	6.24		1.39043		-1.18706	-1.47656		1	0	1	1		3/3
7922	SLC39A7	solute carrier family 39 (zinc transporter), member 7		2.31e-10	0.00013	5.41e-06			2.50743	1.98662	5.7714			1.01853	-1.40216	-3.15063			1	1	1	1		3/4
7982	ST7	suppression of tumorigenicity 7		6.64e-09	0.00109	3.74e-09	0.00268		1.5663	-1.31185	2.3761	-1.4424		1.06878	-1.67014	1.31287	-11.3464		3	1	1	5		4/4
7988	ZNF212	zinc finger protein 212		0.000165		2.15e-05	0.00866		-1.37119		-3.42733	-2.66265		1.00526		1	1.61687		1	1	1	2		3/4
8019	BRD3	bromodomain containing 3		1.16e-05		0.00199	0.0383		1.4084		-1.37255	1.07078		1.28997		-1.0303	-2.66477		2	0	1	1		3/3
8021	NUP214	nucleoporin 214kDa		0.00122		0.00079	0.0279		-1.15102		-2.28341	-2.18934		1.41748		-1.063	1.17463		1	0	1	3		3/3
8030	CCDC6	coiled-coil domain containing 6			0.001	2.19e-05	0.00179			1.0959	-2.09391	-3.04373			1.11395	-1.11507	-2.22727		1	1	1	2		3/4
8140	SLC7A5	solute carrier family 7 (cationic amino acid transporter, y+ system), member 5		8.52e-06	0.00152	3.69e-05			-2.85009	-1.89964	-2.84655			2.25411	1.46595	1.64483			1	1	1	2		3/4
8165	AKAP1	A kinase (PRKA) anchor protein 1		2.27e-07	3.84e-05	3.87e-08	0.038		1.32933	1.81359	2.35567	1.82791		1.16365	-1.28446	-1.16731	-1.40457		2	1	1	1		4/4
8226	HDHD1A	haloacid dehalogenase-like hydrolase domain containing 1A		6.04e-09	0.000396		0.0384		1.72517	1.79727		3.46514		-1.18949	-2.51847		-1.56571		1	1	1	4		3/4
8349	HIST2H2BE	histone cluster 2, H2be		0.00176		0.00183	0.036		-1.38155		-4.19814	-3.59136		1.8508		3.41796	-1.21862		1	0	3	3		3/3
8351	HIST2H3A	histone cluster 1, H3j; histone cluster 1, H3i; histone cluster 1, H3h; histone cluster 1, H3g; histone cluster 1, H3f; histone cluster 1, H3e; histone cluster 1, H3d; histone cluster 1, H3c; histone cluster 1, H3b; histone cluster 1, H3a; histone cluster 1, H2ad; histone cluster 2, H3a; histone cluster 2, H3c; histone cluster 2, H3d		0.00196		2.43e-09	0.0178		-1.85011		-2.6397	-3.51485		1.07666		-1.28848			1	0	1	1		3/3
8395	PIP5K1B	phosphatidylinositol-4-phosphate 5-kinase, type I, beta		1.48e-11		2.72e-10	0.0245		2.88018		15.8309	4.34574		1.044		-1.78677	-1.31844		1	0	1	1		3/3
8490	RGS5	regulator of G-protein signaling 5		3.68e-07		3.71e-09	0.00743		2.48413		2.56993	4.46434		-1.08832		1.17075	1.25151		2	1	1	6		3/4
8495	PPFIBP2	PTPRF interacting protein, binding protein 2 (liprin beta 2)		0.00462		8.33e-06	0.0251		1.48032		-1.11425	1.58685		-1.67628		-1.85768	-2.38228		1	0	1	1		3/3
8501	SLC43A1	solute carrier family 43, member 1		3.17e-08		2.13e-07	0.00526		1.77895		2.27566	10.2677		-1.00148		-1.35137	-5.16957		1	0	1	2		3/3
8513	LIPF	lipase, gastric		5.21e-08		0.000128	0.0447		46.3352		209.857	13.1104		-32.1696		-5.15826	-154.011		1	0	1	1		3/3
8527	DGKD	diacylglycerol kinase, delta 130kDa		7.16e-11	0.00121	1.45e-08	0.0361		2.12144	1.17435	5.55854	11.0022		-1.21147	1.06058	-1.59735	-2.46101		3	1	2	2		4/4
8531	CSDAP1	cold shock domain protein A; cold shock domain protein A pseudogene 1		1.41e-05		0.00237	0.0287		-2.87404		-2.69826	-3.90962		1.40092		1.17356	1.8863		1	1	1	1		3/4
8537	BCAS1	breast carcinoma amplified sequence 1		1.97e-09	0.00712		0.00624		7.69517	1.43611		9.28016		-2.54613	-1.10366		-3.33878		1	1	1	3		3/4
8555	CDC14B	CDC14 cell division cycle 14 homolog B (S. cerevisiae)		0.000342		7.93e-08	0.0144		1.23264		2.64043	3.47874		1.03099		-1.22917	-5.51348		2	0	1	5		3/3
8559	PRPF18	PRP18 pre-mRNA processing factor 18 homolog (S. cerevisiae)			0.001	0.00371	0.0328			-1.05136	1.02383	2.596			-1.59646	-1.3686	-1.94457		1	1	1	4		3/4
8560	DEGS1	degenerative spermatocyte homolog 1, lipid desaturase (Drosophila)		0.00914		0.000369	0.0071		-1.27735		-1.54977	-2.03922		1.27514		1.08145	2.49911		2	0	1	2		3/3
8635	RNASET2	ribonuclease T2		1.48e-07		2.1e-09	0.0208		3.56772		2.50541	3.27893		-1.01809		1.03023	-1.57129		1	0	1	3		3/3
8648	NCOA1	nuclear receptor coactivator 1		0.00191		0.00127	0.0214		-1.28061		1.20437	-1.66011		1.00867		-2.35409	-1.47412		2	1	1	3		3/4
8682	PEA15	phosphoprotein enriched in astrocytes 15		2.3e-06		9.95e-07	0.0407		-2.30866		-2.83558	-2.80342		1.71339		1.3558	3.85897		1	0	1	2		3/3
8741	TNFSF12-TNFSF13	TNFSF12-TNFSF13 readthrough transcript; tumor necrosis factor (ligand) superfamily, member 12; tumor necrosis factor (ligand) superfamily, member 13		2.46e-12		1.18e-07	0.0159		2.89549		3.57917	10.4835		-1.3011		-1.56087	-1.68135		2	1	2	4		3/4
8775	NAPA	N-ethylmaleimide-sensitive factor attachment protein, alpha		0.00247	0.00296	6.72e-05			-1.34763	-3.38323	-2.38221			-1.08602	-1.27481	-1.34783			1	1	1	2		3/4
8776	MTMR1	myotubularin related protein 1		0.000296		4.47e-07	0.0141		-1.30449		-2.06452	-2.35461		1.0203		-1.02159	2.0922		2	1	1	1		3/4
8795	TNFRSF10B	tumor necrosis factor receptor superfamily, member 10b		2.24e-05	0.00102	0.00117			1.78497	1.21689	1.10878			1.57884	1.16088	1.49944			2	1	1	2		3/4
8796	SCEL	sciellin		4.21e-08	0.00233		0.00179		-8.464	-14.7269		-3		-1.17925	-1.37176		-1.57339		1	1	0	1		3/3
8800	PEX11A	peroxisomal biogenesis factor 11 alpha		0.000586	0.00316	4.03e-05			1.66589	1.07099	1.19166			-1.21776	-1.11275	-1.96042			1	1	1	2		3/4
8812	CCNK	cyclin K		0.000475		6.89e-06	0.00995		1.37623		-1.66474	1.28872		1.07747		-1.05359	-3.14374		1	1	1	2		3/4
8842	PROM1	prominin 1		1.11e-11		1.44e-09	0.0227		10.1304		18.4889	4.75212		1.03702		-1.08872	1.70642		1	1	1	1		3/4
8853	ASAP2	ArfGAP with SH3 domain, ankyrin repeat and PH domain 2		1.3e-11		1.19e-07	0.00864		2.84462		2.6746	4.68008		-1.16667		1.00831	-1.41092		1	0	1	1		3/3
8869	ST3GAL5	ST3 beta-galactoside alpha-2,3-sialyltransferase 5		6.55e-05	0.000472	6.9e-06	0.0138		1.4392	1.62743	2.21012	4.7551		-1.08742	-1.34811	-1.02126	2.14388		1	1	1	3		4/4
8876	VNN1	vanin 1		4.64e-08		2.12e-07	0.0453		3.42319		10.7746	4.57324		1.71126		-1.12453	4.22446		1	0	1	3		3/3
8879	SGPL1	sphingosine-1-phosphate lyase 1			0.00801	8.39e-07	0.0451			-1.1422	-1.2183	-1.82432			-1.15487	-1.32216	1.54899		1	1	1	4		3/4
8884	SLC5A6	solute carrier family 5 (sodium-dependent vitamin transporter), member 6		3.2e-05	0.00284	0.00447			1.16759	1.16499	1.34471			1.7271	1.02763	1.25389			1	1	1	1		3/4
8895	CPNE3	copine III			8.13e-05	8.16e-07	0.00302			-1.49471	-2.20558	-2.80769			-2.74909	-1.08642	1.62912		1	1	1	2		3/4
8915	BCL10	B-cell CLL/lymphoma 10; hypothetical LOC646626			3.28e-05	0.00425	0.00676			-1.50607	1.69414	-1.64439			-1.56	-1.25904	-3.11667		1	1	1	3		3/4
8933	FAM127A	family with sequence similarity 127, member A		1.88e-05		1.16e-08	0.0234		-1.80542		-2.97704	-2.99764		1.10731		-1.1181	2.38443		1	0	1	1		3/3
8936	WASF1	WAS protein family, member 1		0.00548		7.73e-07	0.0481		-1.28709		-5.93041	-2.33654		1.10779		4.02062	2.78462		1	0	2	1		3/3
8972	MGAM	maltase-glucoamylase (alpha-glucosidase)			9.03e-05	6.11e-08	0.0333			1.0501	7.87792	-2.46973			-2.01538	-1.4963	2.59081		1	1	3	2		3/4
8985	PLOD3	procollagen-lysine, 2-oxoglutarate 5-dioxygenase 3		7.12e-12		7.69e-11	0.0175		3.2625		3.83284	4.33625		1.75632		1.26167	1.13491		1	0	1	3		3/3
8987	STBD1	starch binding domain 1		2.55e-06	0.000227	4.09e-06	0.00756		1.59472	1.6009	3.22653	2.35608		-1.29756	-1.50084	-1.82415	1.43829		2	1	1	6		4/4
8991	SELENBP1	selenium binding protein 1		1.44e-12		3.5e-09	0.00211		6.32647		5.53451	8.42063		-2.12549		-1.99902	-8.11335		1	0	1	2		3/3
9043	SPAG9	sperm associated antigen 9		0.000775	0.000628	4.49e-05			-1.0978	-1.01136	-1.58566			1.55385	-1.83923	1.23937			2	1	1	3		3/4
9051	PSTPIP1	proline-serine-threonine phosphatase interacting protein 1		0.00437	0.00479	0.00447			1.0595	1.25285	1.56732			1.38916	1.55666	-1.39015			1	1	1	1		3/4
9064	MAP3K6	mitogen-activated protein kinase kinase kinase 6		0.000517		3.4e-09	0.029		-1.99136		-3.26158	-2.85011		1.03132		1.09118	2.21627		2	0	1	2		3/3
9079	LDB2	LIM domain binding 2		0.00225		0.00809	0.0423		1.29359		1.355	4.02786		-1.01232		2.45572	3.32459		1	1	1	1		3/4
9117	SEC22C	SEC22 vesicle trafficking protein homolog C (S. cerevisiae)		2.95e-08		0.00248	0.0241		1.61924		1.50429	1.58944		-1.00084		-1.18412	-3.99828		3	1	1	3		3/4
9159	PCSK7	proprotein convertase subtilisin/kexin type 7 pseudogene; proprotein convertase subtilisin/kexin type 7		2.47e-09		0.00123	0.0404		1.82781		1.85576	2.42222		-1.38277		-1.63288	-1.99297		1	0	1	3		3/3
9185	REPS2	RALBP1 associated Eps domain containing 2		1.47e-09		8.08e-08	0.0054		1.88043		2.77604	8.04107		-1.15046		-1.33584	-2.57496		2	0	2	1		3/3
9204	LOC100130633	hypothetical LOC100130633; zinc finger, MYM-type 6		1.05e-09		1.3e-05	0.0134		1.76462		-3.89512	2.41031		1.25022		5.43659	1.86308		6	0	2	5		3/3
9209	LRRFIP2	leucine rich repeat (in FLII) interacting protein 2		0.00656	0.00933		0.0382		-1.5116	-1.36387		-1.21882		-1.10771	-1.08089		-2.23097		3	1	0	3		3/3
9213	XPR1	xenotropic and polytropic retrovirus receptor		9.8e-07	0.00092		0.0208		1.33536	1.06008		1.30769		1.33212	1.22761		2.42484		1	1	1	3		3/4
9215	LARGE	like-glycosyltransferase		2.37e-11		5.46e-08	0.0079		3.13608		2.66033	4.01254		-1.18182		-1.43759	1.06211		2	1	1	1		3/4
9249	DHRS3	dehydrogenase/reductase (SDR family) member 3		0.00139	0.00102	0.00285			1.4719	-1.30605	-1.52119			-1.70788	-1.52692	-1.02671			1	1	1	2		3/4
9258	MFHAS1	malignant fibrous histiocytoma amplified sequence 1		2.42e-07		0.000139	0.0235		1.42072		1.37408	4.09269		1.20162		1.49946	2.04556		1	1	1	1		3/4
9314	KLF4	Kruppel-like factor 4 (gut)		0.00127		0.00229	0.013		1.25327		1.16214	1.08204		-2.22679		-1.68014	-2.16034		1	1	1	2		3/4
9322	TRIP10	thyroid hormone receptor interactor 10		2.34e-06	1.44e-05	1.05e-09	0.0261		-3.61127	-2.68293	-3.21813	-1.7155		1.30282	-1.08529	-1.45068	-2.08897		1	1	1	1		4/4
9341	VAMP3	vesicle-associated membrane protein 3 (cellubrevin)			2.11e-05	0.000563	0.00179			-1.41757	1.75333	-1.56433			-1.41491	-1.85714	-1.21925		1	1	1	1		3/4
9375	TM9SF2	transmembrane 9 superfamily member 2		0.000175	0.00161	8.46e-05			1.79172	1.53656	2.23964			-1.03259	-2.29892	-1.87531			1	1	1	1		3/4
9397	NMT2	N-myristoyltransferase 2			0.00293	0.000356	0.0245			1.13043	-1.67064	1.38917			1.08676	1.27446	-2.54128		2	1	1	1		3/4
9429	ABCG2	ATP-binding cassette, sub-family G (WHITE), member 2		5.84e-05		0.0011	0.0353		2.31236		5.68047	1.75541		-1.5099		-4.10668	-2.09273		1	0	2	3		3/3
9448	MAP4K4	mitogen-activated protein kinase kinase kinase kinase 4		0.000145		1.95e-06	0.0172		-1.65957		-2.62333	-2.1566		1.56782		1.36167	4.09057		3	0	1	3		3/3
9456	HOMER1	homer homolog 1 (Drosophila)		0.0006	0.00027	1.46e-05			-1.25193	-1.82806	-2.03301			1.20682	1.00791	2.19806			1	1	1	4		3/4
9462	RASAL2	RAS protein activator like 2		9.3e-05		2.47e-11	0.00718		-1.90766		-5.89633	-5.90863		1.10923		1	2.32487		3	0	1	1		3/3
9475	ROCK2	Rho-associated, coiled-coil containing protein kinase 2		3.16e-07		3.59e-05	0.0185		1.65166		-1.64639	3.33415		1.1243		-1.42708	-1.26472		1	1	1	2		3/4
9520	NPEPPS	hypothetical protein FLJ11822; aminopeptidase puromycin sensitive		0.00557		0.00126	0.0128		-1.63727		-2.36569	-2.81152		1.13341		-1.06363	-1.14715		1	0	1	2		3/3
9525	VPS4B	vacuolar protein sorting 4 homolog B (S. cerevisiae)		0.00036		1.36e-06	0.00391		-1.46275		-3.32104	-1.9493		-1.55974		-1.49701	-1.07116		1	0	1	2		3/3
9532	BAG2	BCL2-associated athanogene 2		0.00016		0.00576	0.0275		1.21564		1.52345	7.98907		1.42105		2.03575	2.04856		1	0	1	1		3/3
9590	AKAP12	A kinase (PRKA) anchor protein 12		0.000584		0.000388	0.00855		1.13626		-2.19042	4.57895		1.10735		3.9914	2.76031		3	1	2	2		3/4
9601	PDIA4	protein disulfide isomerase family A, member 4		1.55e-12		0.000117	0.0122		4.26331		-2.7083	4.09532		-1.07779		6.52181	-1.04327		1	0	2	2		3/3
9619	ABCG1	ATP-binding cassette, sub-family G (WHITE), member 1		0.00215		0.000891	0.00916		2.47378		2.75268	2.8454		-1.1958		-2.55277	1.36288		1	0	1	1		3/3
9645	MICAL2	microtubule associated monoxygenase, calponin and LIM domain containing 2		0.00785		0.00131	0.0128		1.1804		-1.33956	13.75		1.06321		-1.07718	1.79915		1	1	1	3		3/4
9650	MTFR1	mitochondrial fission regulator 1		0.00452		1.29e-05	0.0388		1.36087		-2.11667	1.36287		1.11786		2.64815	1.73375		1	0	2	2		3/3
9653	HS2ST1	heparan sulfate 2-O-sulfotransferase 1		2.56e-06	0.00905	0.00784	0.0161		1.36881	1.09449	-1.0706	1.41939		1.22152	1.05486	-1.53417	2.24499		1	1	3	4		4/4
9683	N4BP1	NEDD4 binding protein 1		6.97e-06		7.8e-08	0.00185		-2.11205		3.49117	-2.87273		1.14699		-1.74751			2	1	1	6		3/4
9709	HERPUD1	homocysteine-inducible, endoplasmic reticulum stress-inducible, ubiquitin-like domain member 1		8.7e-07		4.21e-06	0.0396		1.95357		1.7787	2.34221		1.04669		-1.30469	-1.01844		1	0	1	1		3/3
9712	USP6NL	USP6 N-terminal like		0.000197		3.96e-07	0.00629		-2.15521		-3.20445	-3.56997		1.06319		-1.11321	2.69966		1	0	1	3		3/3
9719	ADAMTSL2	similar to ADAMTS-like 2; ADAMTS-like 2		0.00516	0.00651		0.0363		1.12721	1.14114		3.22949		1.35525	1.13581		1.59595		1	1	0	1		3/3
9727	RAB11FIP3	RAB11 family interacting protein 3 (class II)		0.000161	0.000699		0.0224		1.15693	1.14868		4.12659		1.18241	1.13209		1.89141		1	1	1	2		3/4
9736	USP34	ubiquitin specific peptidase 34		0.00868	0.000837	0.000107			1	1.11486	-1.39791			1.19147	1.20519	-1.2287			1	1	1	3		3/4
9743	ARHGAP32	Rho GTPase-activating protein		0.00291		0.00142	0.00276		-1.21996		1.12572	-1.39971		-1.3593		-1.50553	-1.88858		3	1	1	3		3/4
9788	MTSS1	metastasis suppressor 1		0.00112		9.3e-07	0.0143		-1.39653		-7.80325	-3.66777		-1.08758		2.85801	1.74419		1	1	3	2		3/4
9792	SERTAD2	SERTA domain containing 2		0.00103		6.09e-09	0.0413		-1.91648		-3.15938	-2.97442		1.05034		-1.0841	1.00256		1	1	1	1		3/4
9813	KIAA0494	KIAA0494		4.65e-05	0.00818	3.88e-05			1.81589	-1.30482	-1.64227			-1.30076	-1.12466	-1.33619			1	1	1	2		3/4
9855	FARP2	FERM, RhoGEF and pleckstrin domain protein 2		0.000865		4.39e-05	0.0217		1.23351		1.53608	1.85874		-1.10242		-2.11598	-2.76603		1	0	1	1		3/3
9871	SEC24D	SEC24 family, member D (S. cerevisiae)		5.82e-07		6.08e-06	0.0131		2.49681		3.92525	2.34069		-1.30033		-1.95573	-3.65068		1	0	1	2		3/3
9873	FCHSD2	FCH and double SH3 domains 2		0.000657	0.00131	1.27e-07			1.14631	1.14444	3.23538			1.43186	1.13063	-1.74925			1	1	1	3		3/4
9912	RICH2	Rho-type GTPase-activating protein RICH2		4.39e-10		4.37e-08	0.0491		2.9322		4.6343	1.65215		-1.17767		-2.12428	-4.83826		1	0	1	1		3/3
9919	SEC16A	SEC16 homolog A (S. cerevisiae)		6.77e-09	0.00355	0.000551			1.97525	2.04223	-1.56903			1.05597	-1.62589	1.16206			2	1	1	2		3/4
9922	IQSEC1	IQ motif and Sec7 domain 1		5.05e-05	0.00433	6.33e-09			1.15819	1.14072	-2.3664			1.05366	1.13036	-1.20027			1	1	1	2		3/4
9925	ZBTB5	zinc finger and BTB domain containing 5		0.00046	0.00687	2.18e-12	0.00925		-1.71611	1.24833	-2.26029	-2.39811		1.13789	-3.1494	-1.35188	-1.28954		1	1	1	1		4/4
9926	LPGAT1	lysophosphatidylglycerol acyltransferase 1		1.17e-07	0.00175	0.00192			1.26919	1.15447	1.32644			1.29953	1.02201	1.11092			2	1	1	1		3/4
9929	JOSD1	Josephin domain containing 1		9.62e-07	0.00861		0.0402		2.00338	1.23107		2.11187		1.17821	1.04574		-1.12409		1	1	0	3		3/3
9933	KIAA0020	KIAA0020			5.46e-05	3.69e-07	0.0138			-1.21175	6.2575	-1.5106			-1.04609	1.35774	-2.4188		1	1	1	2		3/4
9935	MAFB	v-maf musculoaponeurotic fibrosarcoma oncogene homolog B (avian)		2.68e-06		2.22e-10	0.00226		-2.89523		-2.87794	-4.49772		1.09284		1.08824	3.07763		1	0	1	2		3/3
9937	DCLRE1A	DNA cross-link repair 1A (PSO2 homolog, S. cerevisiae)		3.19e-06	0.00932	0.00112			1.14977	1.09665	1.01289			1.17336	1.06835	-1.5096			1	1	1	2		3/4
9943	OXSR1	oxidative-stress responsive 1			0.00938	0.000548	0.00813			-2.08945	-1.50669	-2.23984			1.05046	-1.37257	-1.20588		0	1	1	2		3/3
9948	WDR1	WD repeat domain 1		0.0017	0.000245	0.000607			1.66284	1.23204	-1.11814			-1.27273	-2.17208	-1.40904			2	1	1	1		3/4
9953	HS3ST3B1	heparan sulfate (glucosamine) 3-O-sulfotransferase 3B1		0.00291		4.84e-05	0.0373		-1.12255		-2.54517	-2.54462		-1.02103		1.43614	7.74142		1	0	1	2		3/3
9990	SLC12A6	solute carrier family 12 (potassium/chloride transporters), member 6		0.00461		0.00573	0.0213		-1.43744		-1.20639	-3.32353		-1.00207		1.69213	1.43529		2	2	1	1		3/4
10008	KCNE3	potassium voltage-gated channel, Isk-related family, member 3		1.02e-11		6.41e-08	0.0269		9.2234		8.59098	14.43		-1.1748		-1.89167	-3.41914		1	0	1	2		3/3
10040	TOM1L1	target of myb1 (chicken)-like 1		0.000482		2.11e-06	0.00379		1.60954		1.78072	1.34468		-1.09274		-1.57692	-6.35959		1	0	1	2		3/3
10049	DNAJB6	DnaJ (Hsp40) homolog, subfamily B, member 6		6.17e-06		1.35e-08	0.0233		-1.98726		-2.54138	-1.76757		1.28153		1.14654	1.04685		3	0	1	2		3/3
10062	NR1H3	nuclear receptor subfamily 1, group H, member 3		4.69e-10		4.56e-09	0.0204		2.64851		3.63536	3.89062		-1.29749		-1.645	-1.9616		1	0	1	1		3/3
10099	TSPAN3	tetraspanin 3		8.56e-11		2.05e-06	0.0342		5.82623		3.79315	10.1436		-1.15091		-2.08583	-1.93925		1	1	1	1		3/4
10103	TSPAN1	tetraspanin 1		1.3e-09		3.45e-11	0.00383		58.3039		63.4969	54.5153		-2.14286		-2.96222	-1.01336		1	0	1	1		3/3
10109	ARPC2	actin related protein 2/3 complex, subunit 2, 34kDa			0.00556	8.35e-05	0.0212			-1.27853	1.91719	-2.16322			-1.03081	2.37653	1.04339		3	1	1	1		3/4
10123	ARL4C	ADP-ribosylation factor-like 4C		0.00313		0.000961	0.0319		-1.20579		-1.76598	-5.52542		1.06217		1.129	3.26695		1	0	1	5		3/3
10125	RASGRP1	RAS guanyl releasing protein 1 (calcium and DAG-regulated)		0.000225		1.06e-06	0.0196		-1.24197		-4.33986	-2.60381		-1.02469		1.36643	1.69068		1	0	1	3		3/3
10129	FRY	furry homolog (Drosophila)		1.99e-07	0.00133		0.0431		1.74667	1.1996		4.14412		-1.17278	1.12479		-1.54026		1	1	1	2		3/4
10135	NAMPT	nicotinamide phosphoribosyltransferase		7.41e-09		3.59e-06	0.0443		-3.36601		-2.91304	-5.18217		1.58824		1.87826	7.00775		3	0	1	2		3/3
10144	FAM13A	family with sequence similarity 13, member A		5.45e-08	0.00521		0.00718		1.90983	1.12027		2.67926		-1.21698	1.15325		-5.50909		3	1	0	4		3/3
10150	MBNL2	muscleblind-like 2 (Drosophila)		0.00107		0.00152	0.0322		1.81491		1.20946	-1.28815		-1.28464		1.78994	-5.08268		3	0	2	5		3/3
10161	LPAR6	purinergic receptor P2Y, G-protein coupled, 5		0.00992		1.39e-11	0.0204		-1.82751		-3.7773	-3.30323		1.01164		1.08227	1.81613		1	0	2	3		3/3
10184	LHFPL2	lipoma HMGIC fusion partner-like 2		2.93e-06	0.00316	3.94e-10	0.0149		2.93735	1.2507	4.75	14.0647		-1.10517	-1.04762	-1.28619	1.19626		1	1	1	1		4/4
10201	NME6	non-metastatic cells 6, protein expressed in (nucleoside-diphosphate kinase)		0.000912		0.000366	0.00356		1.09295		1.1169	1.28503		1.12121		-1.51554	-3.65312		1	1	1	1		3/4
10205	MPZL2	myelin protein zero-like 2		5.2e-09		6.38e-14	0.0107		-2.72066		-5.83844	-5.13274		-1.2327		-1.09285	1.03982		3	0	1	5		3/3
10206	TRIM13	tripartite motif-containing 13		0.000421	0.00217		0.00739		-1.60022	-1.61329		-2.08502		1.07752	1.08308		-1.08333		2	1	1	3		3/4
10231	RCAN2	regulator of calcineurin 2		7.96e-07		0.000126	0.0106		2.73756		2.63582	9.35032		-1.64105		-1.43355	-1.72523		2	1	1	2		3/4
10278	EFS	embryonal Fyn-associated substrate		5.11e-06		2.66e-09	0.00434		-1.8995		-4.19343	-4.81279		-1.0619		-1.42708	2.62557		2	1	1	1		3/4
10312	TCIRG1	T-cell, immune regulator 1, ATPase, H+ transporting, lysosomal V0 subunit A3		1.72e-07		0.00207	0.0427		2.48833		1.72352	2.23795		-1.03356		-1.09801	-1.44887		3	0	1	1		3/3
10331	B3GNT3	UDP-GlcNAc:betaGal beta-1,3-N-acetylglucosaminyltransferase 3		0.00137	0.00528		0.0291		1.70902	1.51467		1.27889		-1.17025	-1.48821		-2.12083		1	1	0	1		3/3
10384	BTN3A3	butyrophilin, subfamily 3, member A3		1.26e-06		0.000179	0.0267		1.51742		1.94634	1.94646		-1.01818		-1.08277	1.09361		1	0	1	2		3/3
10396	ATP8A1	ATPase, aminophospholipid transporter (APLT), class I, type 8A, member 1			1.1e-06	7.71e-06	0.0413			24.5771	3.51186	6.7718			-2.62663	-1.89397	-1.46712		1	2	2	3		3/4
10404	PGCP	plasma glutamate carboxypeptidase		3.18e-07		1.51e-07	0.0178		2.77143		2.90519	4.86235		-1.09527		-1.12185	-1.08404		1	1	1	1		3/4
10418	SPON1	spondin 1, extracellular matrix protein		9.6e-07	0.00481	2.45e-08	0.0293		2.22008	1.32132	3.14725	5.02881		-1.11081	-1.16918	-1.5315	1.24775		1	1	1	2		4/4
10455	PECI	peroxisomal D3,D2-enoyl-CoA isomerase		0.00535	0.00498	0.00427			1.68248	1.08259	1.52977			-1.37066	-1.76337	-1.63892			2	1	1	1		3/4
10457	GPNMB	glycoprotein (transmembrane) nmb		6.54e-05		0.000106	0.0138		-2.07125		-2.61974	-3.23421		1.34125		2.53074	7.55263		1	0	1	3		3/3
10493	VAT1	vesicle amine transport protein 1 homolog (T. californica)		0.0041		1.71e-07	0.0275		-1.96678		-1.9104	-1.74587		1.13511		-1.31929	-3.59361		1	0	1	3		3/3
10516	FBLN5	fibulin 5		2.48e-05		5.75e-07	0.035		1.34568		2.15925	3.32997		1.09258		1.46947	1.79343		1	1	1	2		3/4
10518	CIB2	calcium and integrin binding family member 2		4.93e-05	0.000583	0.00593			1.15638	1.14038	1.94807			1.08096	1.14418	-1.56907			1	1	1	2		3/4
10529	NEBL	nebulette		0.000149		1.59e-09	0.00507		-2.15684		-3.69396	-6.81752		1.04642		-1.05508	2.13139		1	0	1	3		3/3
10544	PROCR	protein C receptor, endothelial (EPCR)		3.19e-06	5e-05	1.48e-05			1.29231	1.65282	1.08309			1.60897	1.55775	3.05653			1	1	1	1		3/4
10550	ARL6IP5	ADP-ribosylation-like factor 6 interacting protein 5		0.000242	9.77e-05	0.00362			2.08299	1.2132	1.36594			-1.39703	-2.56522	-1.54089			1	1	1	1		3/4
10551	AGR2	anterior gradient homolog 2 (Xenopus laevis)		5.61e-14		1.39e-11	0.00276		35.4585		27.3938	17.0391		-2.35135		-1.50225	-2.8957		1	0	1	2		3/3
10558	SPTLC1	serine palmitoyltransferase, long chain base subunit 1		0.000747		9.97e-06	0.0222		-1.70809		-1.72301	-1.74163		1.27081		-1.04915	-2.60166		3	0	1	2		3/3
10559	SLC35A1	solute carrier family 35 (CMP-sialic acid transporter), member A1		1.79e-08		0.00206	0.0448		2.70245		1.90203	1.7342		-1.14984		-1.40141	1.22903		1	0	1	1		3/3
10610	ST6GALNAC2	ST6 (alpha-N-acetyl-neuraminyl-2,3-beta-galactosyl-1,3)-N-acetylgalactosaminide alpha-2,6-sialyltransferase 2		1.65e-06	0.00152	2.09e-06			-1.89931	1.56095	-13.4039			1.11586	-2.42456	6.03448			1	1	1	1		3/4
10636	RGS14	regulator of G-protein signaling 14		0.0074		8.42e-06	0.0283		-1.33298		-3.13592	-7.86471		-1.00954		1.28988	2.97647		1	1	1	1		3/4
10641	NPRL2	tumor suppressor candidate 4		0.0032		5.07e-05	0.0289		1.45397		-1.47226	2.14453		-1.01586		2.41536	-2.11398		1	0	1	2		3/3
10723	SLC12A7	solute carrier family 12 (potassium/chloride transporters), member 7		6.1e-10		8.99e-11	0.00739		3.57544		4.05272	4.08019		1.77233		-1.24117	-1.02149		1	0	1	3		3/3
10725	NFAT5	nuclear factor of activated T-cells 5, tonicity-responsive		0.00471	0.00435		0.048		-1.26837	1.12232		-1.18059		1.25559	1.21606		2.28781		2	1	2	4		3/4
10732	TCFL5	transcription factor-like 5 (basic helix-loop-helix)		0.000456		1.03e-05	0.00215		-1.14022		2.25873	-1.76874		1.47065		-1.80226	4.30114		1	0	1	1		3/3
10788	IQGAP2	IQ motif containing GTPase activating protein 2		2.34e-11		8.93e-12	0.0265		4.96392		15.5572	4.49658		-1.80845		-1.83286	-4.76471		1	0	1	2		3/3
10808	HSPH1	heat shock 105kDa/110kDa protein 1		0.000794		0.000144	0.0327		-1.13436		-1.27738	-1.35544		1.89758		2.34424	3.89948		1	1	1	1		3/4
10809	STARD10	StAR-related lipid transfer (START) domain containing 10		3.12e-11		0.00219	0.0197		4.87855		-5.00624	3.29655		-1.69937		2.41186	-11.1165		2	0	1	1		3/3
10848	PPP1R13L	protein phosphatase 1, regulatory (inhibitor) subunit 13 like		6.36e-06	0.00179	1.55e-10			-3.1119	-3.6782	-4.72645			1.05183	1.28374	-1.02785			1	1	1	1		3/4
10898	CPSF4	cleavage and polyadenylation specific factor 4, 30kDa		0.00565		0.000427	0.016		-1.14058		-1.48421	-2.24664		1.53994		1.65526	1.79148		1	0	1	2		3/3
10903	MTMR11	myotubularin related protein 11		9.68e-11		1.6e-09	0.0472		2.95826		4.53894	8.58633		1.43445		-1.35724	1.0529		2	0	2	2		3/3
10942	PRSS21	protease, serine, 21 (testisin)		0.00334	0.00916	2.06e-07			1.08797	1.11825	2.47606			1.35037	1.34002	-1.33283			1	1	1	1		3/4
10945	KDELR1	KDEL (Lys-Asp-Glu-Leu) endoplasmic reticulum protein retention receptor 1		0.000124	0.00087	0.000757			1.70233	1.4966	1.80176			-1.03503	-1.11919	-1.65319			1	1	1	1		3/4
10954	PDIA5	protein disulfide isomerase family A, member 5		2.19e-13		2.28e-08	0.0256		4.04373		4.7754	7.74596		-1.22418		-1.32591	-1.32439		1	0	1	2		3/3
10966	RAB40B	RAB40B, member RAS oncogene family		3.72e-06	0.00327	1.29e-05			1.36235	1.18064	1.72819			1.32124	1.10735	-1.21749			1	1	1	3		3/4
11012	KLK11	kallikrein-related peptidase 11		0.00123		1.06e-12	0.0333		-1.5801		-4.19553	-4.93991		-1.06466		-1.24306	1.74249		3	0	1	1		3/3
11014	KDELR2	KDEL (Lys-Asp-Glu-Leu) endoplasmic reticulum protein retention receptor 2		9.46e-07		5.92e-08	0.0373		1.843		2.51037	2.07438		1.12817		-1.00721	1.22399		1	0	2	4		3/3
11015	KDELR3	KDEL (Lys-Asp-Glu-Leu) endoplasmic reticulum protein retention receptor 3		6.24e-13		9.93e-11	0.0251		5.97436		7.98584	9.37336		-1.32279		-1.46899	-1.85677		3	1	1	1		3/4
11031	RAB31	RAB31, member RAS oncogene family		0.00615		1.55e-10	0.0425		-1.60199		-3.38958	-1.90893		1.78856		2.91811	6.02405		1	1	2	4		3/4
11033	ADAP1	ArfGAP with dual PH domains 1		2.01e-06	0.00655	1.51e-08			3.58769	1.1189	3.21529			1.75214	1.0445	-1.16745			1	1	1	1		3/4
11046	SLC35D2	solute carrier family 35, member D2		1.44e-12		1.69e-05	0.041		2.56569		2.57143	4.07212		-1.14963		-1.96767	-1.9615		2	0	1	1		3/3
11057	ABHD2	abhydrolase domain containing 2		1.07e-06		0.000253	0.0301		1.50683		2.49755	8.34205		-1.00999		-1.6569	-3.01734		2	0	1	3		3/3
11067	C10ORF10	chromosome 10 open reading frame 10			0.00539	2.58e-07	0.00407			1.32631	3.58902	8.25			1.91914	1.22691	1.32077		1	1	1	3		3/4
11075	STMN2	stathmin-like 2		0.000159	0.000296	2.16e-06			1.40426	1.19512	3.04837			-1.2766	1.01616	-2.45917			1	1	1	1		3/4
11098	PRSS23	protease, serine, 23		0.000393		2.05e-05	0.0474		2.83726		1.78488	5.22449		1.09962		1.0342	2.9144		1	0	3	4		3/3
11119	BTN3A1	butyrophilin, subfamily 3, member A1		6.15e-08		6.95e-06	0.0233		1.60357		2.72791	2.28095		1.02395		-1.25241	1.40339		2	0	1	2		3/3
11142	PKIG	protein kinase (cAMP-dependent, catalytic) inhibitor gamma		1.8e-07		5.6e-05	0.0364		1.91916		1.58146	3.18878		1.12637		1.07194			2	1	1	2		3/4
11145	PLA2G16	phospholipase A2, group XVI		6.24e-13		1.27e-10	0.00935		7.335		8.3541	7.55336		1.20382		1.0471	1.03951		1	0	1	1		3/3
11186	RASSF1	Ras association (RalGDS/AF-6) domain family member 1		2.41e-05	0.0029		0.044		1.36297	1.59394		2.19336		1.17605	-1.29557		1.01825		3	1	0	1		3/3
11199	ANXA10	annexin A10		1.36e-11		3.5e-09	0.00892		26.6645		19.4063	14.7826		-6.53956		-3.13877	-11.1281		1	0	1	1		3/3
11221	DUSP10	dual specificity phosphatase 10		0.00431		0.000126	0.038		1.17117		-1.48628	1.38254		1.15192		-1.19977	3.53668		3	1	1	2		3/4
11259	FILIP1L	filamin A interacting protein 1-like		8.84e-06		4.89e-11	0.0138		1.6259		4.09615	9.58115		1.04204		1.05575	1.87523		3	1	1	2		3/4
11264	PXMP4	peroxisomal membrane protein 4, 24kDa		0.000548		0.00599	0.0065		1.15628		-1.18796	-1.22186		1.10302		-1.09381	-1.94268		3	0	1	2		3/3
11279	KLF8	Kruppel-like factor 8		1.44e-05		6.23e-09	0.0065		-2.12632		-4.40116	-2.57812		-1.10209		-1.38934	-1.93208		1	1	1	3		3/4
11313	LYPLA2P1	lysophospholipase II pseudogene 1; lysophospholipase II		0.0036		9.34e-08	0.00718		1.57915		-1.52082	-3.03205		-1.13962		-1.41466	1.27564		1	0	1	2		3/3
11320	MGAT4A	mannosyl (alpha-1,3-)-glycoprotein beta-1,4-N-acetylglucosaminyltransferase, isozyme A		2.08e-06		4.26e-05	0.031		1.58274		2.07389	3.45752		1.08962		1.17458	1.04556		1	0	1	6		3/3
11328	FKBP9	FK506 binding protein 9, 63 kDa			0.00957	0.00104	0.0278			1.16715	1.18663	2.17772			-1.02126	1.41977	2.38696		1	1	1	1		3/4
11343	MGLL	monoglyceride lipase		0.00272		0.00133	0.00743		-1.28852		1.28094	-1.18782		-1.66563		-2.05125	-4.28761		1	0	1	2		3/3
22796	COG2	component of oligomeric golgi complex 2		3.02e-08		3.77e-05	0.0427		1.81065		1.67551	2.74698		1.0915		-1.16821	1.6231		1	1	1	2		3/4
22809	ATF5	activating transcription factor 5		0.00115		0.000536	0.0462		1.24079		1.33705	1.67818		1.41584		1.42169	2.06338		1	0	1	3		3/3
22822	PHLDA1	pleckstrin homology-like domain, family A, member 1		1.54e-06		4e-07	0.0077		-6.79714		-5.22811	-2.92507		-1.01156		-1.03576	4.66859		1	0	1	4		3/3
22824	HSPA4L	heat shock 70kDa protein 4-like		0.000269		1.08e-08	0.0476		-1.67135		-3.74129	-2.60883		-1.07683		-1.03253	1.58044		1	0	1	2		3/3
22848	AAK1	AP2 associated kinase 1		4.03e-09	0.000434		0.0249		-5.74401	-1.10643		-2.24912		-1.07395	-1.214		-2.8731		3	1	3	11		3/4
22872	SEC31A	SEC31 homolog A (S. cerevisiae)		0.00569	0.00217		0.00718		1.12229	-1.34232		-1.43325		-1.00582	-1.63077		-5.02532		2	1	2	6		3/4
22889	KIAA0907	KIAA0907		0.000236	0.00547	1.14e-06			1.16787	1.12621	-1.93316			1.45072	1.06897	1.25267			1	1	1	2		3/4
22905	EPN2	epsin 2		0.00515		0.00685	0.0079		-1.38052		-1.50384	-2.50909		1.14043		1.00864	1.06494		2	0	1	2		3/3
22918	CD93	CD93 molecule		0.00175		0.00548	0.0319		1.43806		1.12032	-1.0697		2.24067		1.64843	2.19748		1	1	1	3		3/4
22927	HABP4	hyaluronan binding protein 4		0.000105		0.00731	0.0279		1.17821		1.29079	3.61399		1.23892		1.18233	1.25712		1	0	1	2		3/3
22936	ELL2	elongation factor, RNA polymerase II, 2		5.81e-05	0.00102		0.00491		-2.43689	-1.77796		-3.88664		-1.13812	-1.16196		2.29555		1	1	0	5		3/3
22955	SCMH1	sex comb on midleg homolog 1 (Drosophila)		2.73e-05	0.00564	0.000366			1.31765	1.30309	1.30612			1.00714	-1.1385	1.23162			1	1	1	0		3/3
22978	NT5C2	5'-nucleotidase, cytosolic II			0.00162	0.000105	0.038			-1.89793	-3.19383	-1.78947			-1.1117	1.41111	1.27223		2	1	1	2		3/4
22996	TTC39A	tetratricopeptide repeat domain 39A		2.24e-05	0.00556	0.0019			1.6131	1.13695	1.50214			-1.32195	-1.03405	-2.54029			2	1	1	1		3/4
23034	SAMD4A	sterile alpha motif domain containing 4A		0.0036	0.00199	7.22e-06	0.0463		-1.02706	1.13017	-1.82699	4.70173		1.1873	1.05536	1.00218	3.34891		1	1	1	4		4/4
23037	PDZD2	PDZ domain containing 2		0.0067	1.92e-05	5.25e-08	0.0123		-1.90434	-1.6608	-4.81426	-5.70707		-1.01011	-1.27033	1.52405	2.22222		2	1	2	4		4/4
23043	TNIK	TRAF2 and NCK interacting kinase		3.57e-06		0.00727	0.00865		1.14752		-1.40982	4.59689		1.0844		-1.02149			1	1	1	1		3/4
23064	SETX	senataxin		4.49e-06	0.00955	0.00238			1.13333	1.12752	-1.23802			1.20294	1.17857	-1.32849			1	1	1	2		3/4
23102	TBC1D2B	TBC1 domain family, member 2B		6.33e-07	0.00164		0.0239		1.46999	-1.04982		1.86794		1.03997	-1.43377		1.51254		1	1	2	2		3/4
23111	SPG20	spastic paraplegia 20 (Troyer syndrome)			0.000628	5.81e-06	0.0404			-1.20249	-3.41471	1.22714			-1.66898	2.49609	-3.23881		1	1	2	5		3/4
23117	LOC100132247	nuclear pore complex interacting protein-like 3; similar to Uncharacterized protein KIAA0220		0.00075		2.97e-05	0.0393		1.05427		-4.77356	1.14068		2.23356		6.69014	-3.39053		2	0	1	4		3/3
23136	EPB41L3	erythrocyte membrane protein band 4.1-like 3		6.67e-12		3.45e-11	0.0123		-5.34534		-5.47262	-9.78906		1.018		-1.09375	3.69531		1	0	1	2		3/3
23171	GPD1L	glycerol-3-phosphate dehydrogenase 1-like		0.001	0.001		0.000951		1.4499	-1.28967		-1.05146		-1.83245	-1.53282		-4.44395		1	1	1	1		3/4
23175	LPIN1	lipin 1			0.00422	1.81e-09	0.00876			-4.53608	-1.93666	-3.48338			-1.37915	-1.97653	-1.55399		2	1	1	1		3/4
23189	KANK1	KN motif and ankyrin repeat domains 1; similar to ankyrin repeat domain protein 15 isoform b		8e-05		7.59e-13	0.0077		-2.09956		-3.26505	-3.65188		-1.07026		-1.30801	1.57338		3	0	2	2		3/3
23203	PMPCA	peptidase (mitochondrial processing) alpha		0.00143		4.42e-07	0.0185		1.20719		-1.87931	-1.67007		1.32738		1.16872	-3.58537		1	1	1	2		3/4
23220	DTX4	deltex homolog 4 (Drosophila)		0.000156		6.24e-07	0.00755		1.129		-2.52189	3.59325		-1.04028		1.05917	-1.43961		1	0	1	2		3/3
23228	PLCL2	phospholipase C-like 2		1.5e-09		7.36e-11	0.0218		2.60473		5.8036	11.1321		-1.2598		-1.76155	-2.29913		1	1	1	1		3/4
23235	SIK2	salt-inducible kinase 2		0.00057		0.004	0.0428		1.26244		-1.4507	1.61287		1.0224		1.09101	1.07587		2	1	1	5		3/4
23240	KIAA0922	KIAA0922		0.000339		3.29e-06	0.00164		-1.37691		-2.2055	-2.54348		1.13399		1.10995	2.72174		1	0	1	2		3/3
23242	COBL	cordon-bleu homolog (mouse)		3.06e-05	0.00837		0.00391		1.47854	1.10619		1.77717		1.16567	1.0438		-8.75135		1	1	0	5		3/3
23245	ASTN2	astrotactin 2		2.65e-05	0.00399		0.0114		1.2071	1.23367		5.31878		1.07353	-1.04224		-1.09893		3	1	1	1		3/4
23247	KIAA0556	KIAA0556		0.0095	0.000942	3.57e-08			1.20633	1.11287	-1.97191			1.09502	1.08719	-1.10285			1	1	1	1		3/4
23266	LPHN2	latrophilin 2		6.54e-06	0.000114	3.49e-08	0.00609		-2.16298	-1.16144	-7.19048	-3.46786		1.3674	-1.36234	3.84712			1	1	2	3		4/4
23271	CAMSAP1L1	calmodulin regulated spectrin-associated protein 1-like 1		0.00203		0.00321	0.038		-1.43876		-1.13497	-1.6519		1.32224		2.43681	2.37816		2	1	1	4		3/4
23284	LPHN3	latrophilin 3		0.000362	0.0025	0.00138			1.29032	1.13204	-1.67552			-1.07907	1.08662	-1.137			1	1	1	3		3/4
23287	AGTPBP1	ATP/GTP binding protein 1		0.00895	0.00836	9.29e-06			1.04094	1.08399	-1.62359			1.19469	1.08113	-1.23731			2	1	1	3		3/4
23301	EHBP1	EH domain binding protein 1		0.00589	0.00337		0.0278		-1.63882	-1.28501		-3.26611		1.41765	-1.11004		1.51821		1	1	0	2		3/3
23325	KIAA1033	KIAA1033		0.00357		5.79e-07	0.0218		1.19558		-1.80331	1.30586		1.08965		-1.74101	-5.86831		2	0	1	4		3/3
23328	SASH1	SAM and SH3 domain containing 1		1.71e-05	8.21e-06	5.53e-10	0.00955		-3.19304	-6.96094	-7.28395	-8.21277		-1.0452	-1.28	1.01852	-1.35577		2	2	1	3		4/4
23353	SUN1	unc-84 homolog A (C. elegans)		0.000261		0.00145	0.0468		1.13014		-2.07951	-3.44762		1.43737		-1.01247	1.05079		1	1	1	3		3/4
23423	TMED3	transmembrane emp24 protein transport domain containing 3			5.54e-07	1.08e-05	0.0441			-1.80851	-1.97062	-1.50833			-2.39352	1.06529	-1.8677		1	1	1	2		3/4
23474	ETHE1	ethylmalonic encephalopathy 1			0.00434	1.64e-05	0.048			-1.09019	1.19051	1.16915			-1.90019	-2.15855	-2.47037		1	1	1	1		3/4
23530	NNT	nicotinamide nucleotide transhydrogenase		0.000335	9.41e-06	0.000515			1.40074	1.17316	-1.71964			1.11796	-1.96735	1.16459			3	1	3	2		3/4
23556	PIGN	phosphatidylinositol glycan anchor biosynthesis, class N		9.74e-05		0.00237	0.00254		-1.34692		2.31503	-2.12403		-1.27724		-3.54603	-1.13907		2	1	1	5		3/4
23559	WBP1	similar to WW domain binding protein 1; WW domain binding protein 1		0.00247	0.00798	6.84e-05	0.00388		1.567	1.115	-1.83696	3.16858		-1.01554	1.12197	1.57367	1.17911		1	1	1	1		4/4
23584	VSIG2	V-set and immunoglobulin domain containing 2		2.76e-09		1.09e-08	0.012		10.3985		3.23668	1.56283		-6.01304		-2.28062	-3.50593		1	1	1	1		3/4
23608	MKRN1	makorin ring finger protein pseudogene 6; makorin ring finger protein 1		0.00037	0.000671	1.26e-05			1.61364	-1.37695	1.2355			-1.0672	-1.77991	-1.64685			1	1	1	2		3/4
23636	NUP62	nucleoporin 62kDa		1.97e-05		2.51e-05	0.0485		1.02188		-8.6627	-1.01174		2.57492		3.9623	2.41915		4	1	1	3		3/4
23650	TRIM29	tripartite motif-containing 29		2.11e-08		2.68e-08	0.0185		-5.54295		-7.14315	-4.40283		1.07293		-1.03879	2.38163		3	1	1	1		3/4
23670	TMEM2	transmembrane protein 2		8.29e-11	0.00161	1.76e-12	0.0296		2.33403	1.12733	4.88486	10.1319		1.30322	1.12948	-1.11268	1.31977		1	1	2	1		4/4
23767	FLRT3	fibronectin leucine rich transmembrane protein 3		6.66e-07	0.00237	2.8e-08			2.5539	1.12425	4.22513			1.12009	1.06012	-1.28027			2	1	1	1		3/4
24146	CLDN15	claudin 15		2.45e-07	0.00157	6.98e-05			4.76274	1.156	3.27921			1.09529	1.07785	-1.20111			3	1	1	1		3/4
25778	DSTYK	dual serine/threonine and tyrosine protein kinase		0.000376	5.28e-05		0.023		-1.41776	-1.53079		-1.44061		-1.03661	-1.14815		2.42403		2	1	1	3		3/4
25801	GCA	grancalcin, EF-hand calcium binding protein		0.000983		4.12e-07	0.0256		1.66715		2.12409	2.13811		1.43257		1.1732	2.30008		1	0	1	2		3/3
25828	TXN2	thioredoxin 2		0.00214	0.00831	0.00785			1.67901	1.23052	-1.61439			-1.30909	1.13281	1.69929			1	1	1	2		3/4
25829	TMEM184B	transmembrane protein 184B		3.59e-06	0.00957	0.000576			1.62724	1.65862	1.46904			1.06171	-1.22585	-1.04108			1	1	1	2		3/4
25831	HECTD1	HECT domain containing 1			0.00013	0.00279	0.0145			-2.64663	-2.12334	-1.96409			-1.80087	-1.03504	-1.12298		1	1	1	3		3/4
25870	SUMF2	sulfatase modifying factor 2		4.49e-06	0.00201		0.00791		1.89671	1.174		1.05632		1.20957	-1.09413		-4.29721		1	1	0	1		3/3
25875	LETMD1	LETM1 domain containing 1		3.59e-07	2.48e-05		0.02		1.8803	1.14683		1.44258		-1.04726	1.05104		-1.87273		1	1	1	1		3/4
25888	ZNF473	zinc finger protein 473		1.3e-05	0.000151		0.00369		1.2073	1.09109		2.34347		1.19122	1.0781		1.29689		1	1	1	2		3/4
25902	MTHFD1L	methylenetetrahydrofolate dehydrogenase (NADP+ dependent) 1-like		1.35e-06	0.00126	0.00521			1.17153	1.20382	-1.22509			1.7622	1.33862	-1.26659			1	1	1	4		3/4
25924	MYRIP	myosin VIIA and Rab interacting protein		0.000709		0.0016	0.0273		1.21389		-1.51466	2.05047		-1.10163		1.03909	-5.29139		1	0	1	1		3/3
25945	PVRL3	poliovirus receptor-related 3		9.85e-12		4.27e-07	0.00894		3.63546		8.75216	47.9332		-1.37425		-2.06178	-5.03281		1	0	1	5		3/3
25960	GPR124	G protein-coupled receptor 124		0.00202		2.66e-05	0.0192		1.25759		-1.53238	6.2343		1.11896		-1.48811	1.80419		1	0	1	1		3/3
25975	EGFL6	EGF-like-domain, multiple 6		0.000164	0.0035	6.38e-07	0.000153		-1.65264	1.1278	-3.29167	-1.56659		1.40385	1.13668	2.88281	3.01285		1	1	1	1		4/4
25999	CLIP3	CAP-GLY domain containing linker protein 3		0.000261		0.00939	0.0244		1.6599		1.31987	4.32755		-1.0464		-1.57418	1.40491		1	1	1	2		3/4
26049	FAM169A	family with sequence similarity 169, member A		0.00898		0.000515	0.0218		-1.05888		1.77224	3.76114		-1.01756		-1.46614	-1.8286		1	0	1	3		3/3
26053	AUTS2	autism susceptibility candidate 2			0.00975	3.91e-05	0.0302			-1.19843	-1.80597	-1.6877			-1.41363	1.21269	1.96278		1	1	2	1		3/4
26085	KLK13	kallikrein-related peptidase 13		9.16e-09	1.78e-05	0.000549			-9.94949	-30.9259	-5.67416			-1.23237	-1.7234	-1.09069			1	1	1	1		3/4
26118	WSB1	WD repeat and SOCS box-containing 1		0.00969		0.000561	0.00753		1.15142		-1.41637	1.97805		1.35194		2.45969	-5.57895		2	0	2	9		3/3
26286	ARFGAP3	ADP-ribosylation factor GTPase activating protein 3		9.4e-06		0.0039	0.0462		1.8859		1.54345	2.79		1.13277		-1.31737	1.42685		2	1	1	1		3/4
26353	HSPB8	heat shock 22kDa protein 8		1.08e-08		2.18e-12	0.0197		-6.01736		-7.82748	-8.24074		-1.07461		1.13099	2.2716		1	1	1	2		3/4
26469	PTPN18	protein tyrosine phosphatase, non-receptor type 18 (brain-derived)		0.00718	4.34e-06	2.69e-05			1.15293	1.32784	1.91528			-1.02113	-1.02547	-1.21202			1	1	1	2		3/4
26499	PLEK2	pleckstrin 2		9.63e-10		5.84e-05	0.0269		2.57624		2.01856	2.2		-1.10243		-1.07162			1	0	1	1		3/3
26504	CNNM4	cyclin M4		2.74e-08	0.000702		0.0259		2.24286	1.12586		2.93499		-1.17456	-1.07109		-1.8416		1	1	0	2		3/3
26524	LATS2	LATS, large tumor suppressor, homolog 2 (Drosophila)		0.000627		0.000103	0.0297		-1.11608		-1.67024	-2.17914		1.22258		1.16274			1	1	3	2		3/4
26578	OSTF1	osteoclast stimulating factor 1		0.000302		4.74e-05	0.00373		-1.61506		-1.88141	-3.13499		-1.25955		-2.30511	-1.25606		1	1	1	2		3/4
26999	CYFIP2	cytoplasmic FMR1 interacting protein 2		1.1e-05	0.00589	0.00429			1.25432	1.625	2.252			1.01376	-1.40196	-1.28665			1	2	1	2		3/4
27076	LYPD3	LY6/PLAUR domain containing 3		5.84e-09		1.55e-14	0.00179		-7.79747		-7.25989	-7.9021		-1.2376		1.31356	2.13287		1	0	1	1		3/3
27109	ATP5S	ATP synthase, H+ transporting, mitochondrial F0 complex, subunit s (factor B)			0.00711	2.65e-05	0.0031			-1.41361	-1.97253	-1.09847			-1.02654	1.04396	-2.19185		1	1	1	1		3/4
27121	DKK4	dickkopf homolog 4 (Xenopus laevis)		0.000272	0.000941	6.42e-06			-1.65131	-1.52933	-1.78218			1.0534	-1.00143	1.28465			1	1	1	1		3/4
27124	INPP5J	inositol polyphosphate-5-phosphatase J		2.76e-06	0.00563	6.08e-05			1.66881	1.12261	1.7138			-1.07349	1.10385	-1.28827			1	1	1	1		3/4
27134	TJP3	tight junction protein 3 (zona occludens 3)		0.00148	0.000842	0.000107			2.12154	1.25098	-1.1849			-1.53052	1.03541	-1.5058			1	1	1	1		3/4
27250	PDCD4	programmed cell death 4 (neoplastic transformation inhibitor)		0.000385		2.63e-05	0.00126		-1.02472		-1.8711	1.02142		-2.07244		-1.67538	-2.22621		2	0	1	3		3/3
27342	RABGEF1	RAB guanine nucleotide exchange factor (GEF) 1			0.000878	0.00102	0.0183			-2.50226	-1.56234	-1.85974			-1.09677	1.2182	2.26412		1	1	1	3		3/4
27346	TMEM97	transmembrane protein 97		1.45e-11		1.72e-07	0.0214		4.88333		3.53397	1.80223		1.10307		-1.21115	-7.24211		1	0	2	2		3/3
28951	TRIB2	tribbles homolog 2 (Drosophila)		5.38e-10		2.88e-06	0.0354		1.73356		2.60561	2.22435		1.35895		-1.06617	1.26145		1	1	1	3		3/4
29766	TMOD3	tropomodulin 3 (ubiquitous)		0.00123		2.97e-07	0.00179		-1.90429		-5.01424	-8.45378		-1.01678		-1.32897	1.23529		1	0	3	2		3/3
29785	CYP2S1	cytochrome P450, family 2, subfamily S, polypeptide 1		7.72e-10		4.35e-06	0.00985		2.83136		4.98722	4.6248		-1.67748		-2.12402	-2.3898		1	1	1	1		3/4
29841	GRHL1	grainyhead-like 1 (Drosophila)		0.00127	0.00307	0.000473			-1.154	-1.30689	1.71544			-1.08932	1.05462	-1.34494			2	1	1	1		3/4
29855	UBN1	ubinuclein 1		1.87e-07		0.000268	0.0336		1.79803		-1.34392	1.50473		1.17991		-1.39827	-3.58647		2	1	1	2		3/4
29902	C12ORF24	chromosome 12 open reading frame 24		0.00679	0.00375	0.00134			1.05058	1.07094	1.11765			1.26179	1.24655	1.60421			1	1	1	2		3/4
29956	LASS2	LAG1 homolog, ceramide synthase 2		5.28e-10	0.00145		0.0015		2.54988	1.76452		2.40144		1.56961	-1.04484		-1.4832		1	1	0	2		3/3
29959	NRBP1	nuclear receptor binding protein 1		0.00599	0.00275	1.2e-05			-1.38537	1.31862	-1.75354			-1.00881	1.30058	-1.35944			1	1	1	3		3/4
30011	SH3KBP1	SH3-domain kinase binding protein 1		1.53e-05		2.4e-11	0.00926		3.55455		3.82947	5.65621		1.39557		1.04783	1.01664		1	1	1	2		3/4
30845	EHD3	EH-domain containing 3		6.92e-05		0.00123	0.0083		-1.72895		-2.40879	-10.3302		-1.01142		-1.1032	3.07534		1	0	1	3		3/3
50618	ITSN2	intersectin 2			4.6e-05	9.07e-06	0.031			-1.76814	-3.48292	-2.01036			-1.11817	-1.00118			2	1	2	4		3/4
50636	ANO7	anoctamin 7		6.23e-08		4.51e-08	0.0399		1.92192		5.43317	3.98861		-1.38227		-3.21994	-2.15283		2	0	1	1		3/3
50807	ASAP1	ArfGAP with SH3 domain, ankyrin repeat and PH domain 1		7.48e-05	0.000332	3.18e-07			-1.0555	1.12133	-5.59005			1.93145	1.09739	11.4134			1	1	1	3		3/4
50808	AK3	adenylate kinase 3			0.00689	0.0082	0.0297			-1.13775	1.85177	1.5243			-1.57973	-1.87863	-2.73677		1	1	1	2		3/4
50853	VILL	villin-like		2.51e-13	0.000291	7.39e-07			11.6789	1.55655	8.37057			-2.47907	-1.61254	-2.71618			2	1	1	1		3/4
50862	RNF141	ring finger protein 141		0.000291	0.0032	2.77e-06	0.0215		-1.26603	-1.65517	-12.829	-4.43254		-1.32783	-1.04419	4.03548	1.48016		1	1	1	4		4/4
51074	LOC100128086	APAF1 interacting protein; similar to APAF1 interacting protein		0.000125		5.76e-08	0.046		1.50513		2.20285	-1.31735		1.07836		-1.26479	-3.24929		1	0	1	2		3/3
51099	ABHD5	abhydrolase domain containing 5		0.00309		0.000191	0.00396		-1.81356		-1.21002	-2.8764		-1.07151		-1.43121	1.11236		1	0	1	6		3/3
51100	SH3GLB1	SH3-domain GRB2-like endophilin B1			0.00026	0.000378	0.0105			-1.48311	-1.66563	-2.15673			-1.29222	-1.04348	1.6468		1	1	1	5		3/4
51150	SDF4	stromal cell derived factor 4		1.02e-09	0.000862	0.00115			2.3125	1.33872	-1.57739			1.00225	1.05705	1.3755			2	1	1	0		3/3
51205	ACP6	acid phosphatase 6, lysophosphatidic		9.57e-09	0.000151	0.00888			1.73901	1.41649	1.46801			-1.02344	-1.23118	-1.00153			1	1	1	2		3/4
51208	CLDN18	claudin 18		5.31e-09		1.48e-05	0.0115		5.28257		-1.82741	13.6217		-2.04977		-1.28322	-3.24856		1	0	1	3		3/3
51231	VRK3	vaccinia related kinase 3		7.21e-12	0.00262		0.0374		1.92462	1.20205		-1.31421		1.01759	-1.02002		-4.54658		1	1	1	3		3/4
51279	C1RL	complement component 1, r subcomponent-like			0.00102	0.000394	0.0181			1.1237	1.45084	1.98851			1.1563	-1.10806	1.75985		1	1	1	1		3/4
51303	FKBP11	FK506 binding protein 11, 19 kDa		2.2e-08	0.00973	3.74e-07			2.91705	-1.10867	1.80297			-1.00079	-1.33187	1.27844			1	1	1	1		3/4
51312	SLC25A37	solute carrier family 25, member 37		2.6e-06		1.03e-05	0.0137		2.00146		2.37193	3.853		-1.06507		-1.22692	-1.24697		3	0	2	6		3/3
51332	SPTBN5	spectrin, beta, non-erythrocytic 5		9.94e-06	0.00332	0.000812			-1.24101	1.11023	-1.23857			1.02326	1.12254	-1.30083			1	1	1	1		3/4
51393	TRPV2	transient receptor potential cation channel, subfamily V, member 2		0.000292	0.000351		0.00677		1.13025	1.09163		-7.93651		1.14857	1.07847				1	1	0	2		3/3
51406	NOL7	nucleolar protein 7, 27kDa		0.000794	1.06e-05		0.00755		1.32328	-7.26389		-2.28281		1.29809	-1.16129		-1.37267		1	1	1	2		3/4
51493	C22ORF28	chromosome 22 open reading frame 28		0.00116	0.00233	0.00271			1.55444	-1.27353	1.02231			-1.08188	-1.67488	-1.41144			1	1	1	1		3/4
51495	PTPLAD1	protein tyrosine phosphatase-like A domain containing 1		3.71e-06	0.00165	1.11e-07	0.00883		1.41371	1.73077	2.29868	3.32899		1.04502	-1.14433	1.21752	1.09792		1	1	2	5		4/4
51526	C20ORF111	chromosome 20 open reading frame 111		0.00182	0.00784	2.09e-06	0.0317		-1.47474	-1.46761	1.33449	-2.11338		1.56404	1.02817	-2.09913	1.95911		1	1	1	3		4/4
51566	ARMCX3	armadillo repeat containing, X-linked 3		6.15e-09		1.52e-10	0.00127		1.66971		2.83835	3.7597		1.17502		1.02252	-1.49793		2	0	1	3		3/3
51567	TTRAP	TRAF and TNF receptor associated protein		0.00624	0.00824	0.00975			1.50056	1.61191	1.76805			-1.1991	-2.23547	-1.03923			1	1	1	1		3/4
51663	ZFR	zinc finger RNA binding protein		0.00117	0.00402	0.000896			1.22132	1.14067	-1.47665			1.25712	1.09651	1.69643			1	1	2	3		3/4
51696	HECA	headcase homolog (Drosophila)		0.0031	0.000923	0.00512			-1.60845	-2.08721	-1.60236			1.0879	-1.16216	1.0686			1	1	1	2		3/4
51703	ACSL5	acyl-CoA synthetase long-chain family member 5		1.2e-11	0.000437	4.26e-07	0.0368		7.59669	4.22617	4.8782	8.33		-1.07759	-2.20585	-1.45406	-1.46304		3	1	1	2		4/4
51704	GPRC5B	G protein-coupled receptor, family C, group 5, member B		8.38e-08	0.000135		0.0242		3.68934	2.68602		9.62645		-1.05108	-1.68042		1.51509		1	1	0	2		3/3
51715	RAB23	RAB23, member RAS oncogene family		0.00162		0.0013	0.0393		1.27897		1.74348	2.82812		1.09763		1.28088	2.02824		3	0	2	2		3/3
53918	PELO	pelota homolog (Drosophila)		0.000545	0.00379	1.3e-06	0.0143		1.11708	1.06442	2.1198	2.6089		1.17115	1.0959	1.67033	2.12371		2	1	1	4		4/4
54020	SLC37A1	solute carrier family 37 (glycerol-3-phosphate transporter), member 1		2.24e-08		0.000202	0.0405		2.71651		1.97024	3.31146		-1.17047		-2.66324	-3.19263		1	1	1	1		3/4
54431	DNAJC10	DnaJ (Hsp40) homolog, subfamily C, member 10		1.24e-10		1.59e-07	0.00743		2.66109		2.09857	3.38424		1.03145		-1.05154	-1.48485		1	1	1	4		3/4
54463	FAM134B	family with sequence similarity 134, member B		8.97e-10		4.68e-06	0.0155		3.36534		1.98874	5.28925		1.00993		-1.135	-2.89833		1	0	1	3		3/3
54472	TOLLIP	toll interacting protein		0.00936	0.000247	7.26e-10	0.0339		-1.01346	-1.15727	-3.61155	-3.22513		-1.24402	-1.17452	-1.34399	1.48429		1	1	1	4		4/4
54474	KRT20	keratin 20		1.87e-10		3.51e-07	0.0145		13.8547		58.9121	25.1592		-4.24153		-7.48671	-2.79922		1	1	1	3		3/4
54475	NLE1	notchless homolog 1 (Drosophila)		0.00294	0.000241	3.02e-05			1.07667	1.10913	-2.46688			1.18616	1.17442	-1.15556			1	1	1	1		3/4
54536	EXOC6	exocyst complex component 6		7.81e-13	0.00215	2.89e-08	0.0223		2.08787	1.13931	2.2981	2.38526		1.08754	1.0737	-1.1561	-1.03114		1	1	1	2		4/4
54625	PARP14	poly (ADP-ribose) polymerase family, member 14		1.82e-06	0.00347	0.000118	0.0451		1.66216	1.08069	-3.71127	2.30193		1.39476	1.26044	2.17183	1.67907		3	1	1	3		4/4
54626	HES2	hairy and enhancer of split 2 (Drosophila)		2.86e-08	0.00415	6.47e-07			-2.45655	1.10651	-2.64378			1.08301	1.13369	1.01288			1	1	1	2		3/4
54675	CRLS1	cardiolipin synthase 1		7.67e-08		8.33e-07	0.0213		2.16746		1.49088	2.71825		1.16983		2.13219	-1.11196		1	0	1	4		3/3
54764	ZRANB1	zinc finger, RAN-binding domain containing 1		0.00377		3.09e-05	0.0185		-1.08851		-1.68454	2.47623		1.45205		-1.0931	1.12194		1	0	1	3		3/3
54994	C20ORF11	chromosome 20 open reading frame 11		1.3e-05	0.000203		0.037		-2.12887	-1.64123		-2.5		1.26031	-1.36585		2.18958		1	1	0	2		3/3
55002	TMCO3	transmembrane and coiled-coil domains 3		0.00227	0.000379		0.0457		1.15556	1.50556		3.51148		-1.04298	-1.19887		1.11801		1	1	0	1		3/3
55030	FBXO34	F-box protein 34		0.00898	7.76e-05		0.00116		-1.70295	-3.63462		-2.49428		-1.22264	-1.38298		-1.0331		1	1	1	3		3/4
55075	UACA	uveal autoantigen with coiled-coil domains and ankyrin repeats		0.000531	0.000619		0.0299		-1.98182	-2.75907		-2.82808		1.07614	1		2.02292		1	1	0	3		3/3
55084	SOBP	sine oculis binding protein homolog (Drosophila)		9.32e-08	0.00451		0.0306		2.05699	1.24816		4.70088		-1.19182	-1.20926		-1.0563		2	1	0	1		3/3
55122	AKIRIN2	akirin 2		3.65e-05	6.61e-05		0.0031		-1.56455	-1.58132		-2.26895		1.30282	-1.06154		-4.13131		1	1	0	5		3/3
55183	RIF1	RAP1 interacting factor homolog (yeast)		0.00618	0.00024		0.0283		1.05927	1.08964		-1.45339		1.10173	1.08684		-3.48768		1	2	1	4		3/4
55219	TMEM57	transmembrane protein 57		0.00909		0.00292	0.00216		-1.74622		-1.32082	-2.35022		1.0216		-1.20576	-2.98684		1	0	1	3		3/3
55268	ECHDC2	enoyl Coenzyme A hydratase domain containing 2		0.00124	0.000177		0.0272		-1.24673	-1.20438		1.04605		-1.57619	-1.25114		-2.57639		1	1	0	5		3/3
55276	PGM2	phosphoglucomutase 2		0.00127	0.000136		0.0121		-2.16374	-3.28052		-4.08519		1.15088	-1.40511		1.66667		1	1	0	3		3/3
55337	C19ORF66	chromosome 19 open reading frame 66		0.0084		0.000757	0.0299		1.28765		-1.35658	2.11846		1.05465		2.74474	1.70871		1	1	1	1		3/4
55349	CHDH	choline dehydrogenase		1.94e-05		2.38e-05	0.0019		1.17108		1.84026	2.36037		1.1263		-1.03582	-4.3874		1	0	1	3		3/3
55608	ANKRD10	ankyrin repeat domain 10		1.65e-08	0.00636		0.00756		1.4633	-2.02524		3.07493		1.20724	-1.47786		1.01986		1	1	0	3		3/3
55638	GOLSYN	Golgi-localized protein		1.24e-10	0.00799		0.0445		2.13682	1.15167		2.08676		1.30751	-1.01155		-1.00395		1	1	0	1		3/3
55701	FLJ10357	hypothetical protein FLJ10357			0.000777	0.00285	0.00875			-1.42037	-1.20873	3.46415			-1.37205	2.88605	1.10648		0	1	1	2		3/3
55824	PAG1	phosphoprotein associated with glycosphingolipid microdomains 1		7.37e-06	2.7e-05		0.0234		2.15727	1.41569		4.49158		1.01513	-1.07922		2.57502		2	1	0	2		3/3
55841	WWC3	WWC family member 3		0.00203	0.00942		0.00923		-1.33939	1.11527		-2.38889		1.25312	1.13781		2.65509		1	1	0	4		3/3
55970	GNG12	guanine nucleotide binding protein (G protein), gamma 12			0.000181	4.03e-08	0.00499			-1.75253	-1.46958	-1.7812			-1.76261	-1.8853	-2.69432		1	1	1	1		3/4
56180	MOSPD1	motile sperm domain containing 1		0.000468	0.00024		0.0329		-1.48165	-1.87164		-2.4141		1.08231	-1.27778		1.26211		1	1	0	2		3/3
56654	NPDC1	neural proliferation, differentiation and control, 1		4.15e-11		2.21e-05	0.0159		3.89897		3.75778	3.98939		-1.7558		-2.06977	-2.0986		2	0	1	1		3/3
56889	TM9SF3	transmembrane 9 superfamily member 3		2.76e-08	0.00101	1.19e-05	0.0131		3.17992	2.03799	1.98526	2.39899		-1.44741	-2.7199	-1.4329	-1.84538		1	1	2	4		4/4
56987	BBX	bobby sox homolog (Drosophila)		1.1e-05		5.76e-08	0.0288		1.39974		-1.27595	1.0106		1.21855		-2.44252	-3.55014		1	0	2	3		3/3
56997	CABC1	chaperone, ABC1 activity of bc1 complex homolog (S. pombe)		2.44e-07	0.00026		0.0339		1.8915	1.9981		1.06953		1.32481	-1.12889		-1.54783		1	1	0	2		3/3
57016	AKR1B10	aldo-keto reductase family 1, member B10 (aldose reductase); aldo-keto reductase family 1, member B10-like		9.56e-07		0.000274	0.018		3.40877		1.91367	1.86263		-5.71471		-2.42063	-4.24885		3	1	2	1		3/4
57037	ANKMY2	ankyrin repeat and MYND domain containing 2		2.24e-06		0.0028	0.0137		2.21821		1.08222	2.80585		-1.0405		-1.66667	-1.60958		1	1	1	1		3/4
57062	DDX24	DEAD (Asp-Glu-Ala-Asp) box polypeptide 24		0.00524	0.00805	0.00496	0.0294		1.13596	1.11576	-1.40994	1.06567		1.15727	1.11247	1.33168	1.76673		1	1	2	3		4/4
57110	HRASLS	HRAS-like suppressor		0.000574		2.02e-05	0.000153		-1.77921		-2.37562	-4.03008		1.12383		-1.2404	-1.54651		1	0	1	1		3/3
57136	C20ORF3	chromosome 20 open reading frame 3		1.56e-10		0.000638	0.0279		1.82915		1.48735	2.0603		1.77035		1.17368	2.32373		1	1	1	2		3/4
57146	TMEM159	transmembrane protein 159		0.00457	0.000236		0.0135		-1.55077	-1.50069		-5.50222		-1.07986	-1.09351		-2.26131		1	1	1	1		3/4
57157	PHTF2	putative homeodomain transcription factor 2		0.0098	0.00738	0.000489			-1.43778	-1.06603	-2.375			1.18326	1.1459	1.61218			1	1	1	3		3/4
57159	TRIM54	tripartite motif-containing 54		2.18e-05		4e-05	0.0351		1.50844		3.02326	2.29613		1.04474		-1.25604	-6.11379		2	0	1	1		3/3
57162	PELI1	pellino homolog 1 (Drosophila)		0.00192	0.00291	4.14e-08	0.00548		-1.97739	-3.84462	-8.08354	-3.79424		1.38317	1.02789	3.35443	1.81893		1	1	1	1		4/4
57325	CSRP2BP	CSRP2 binding protein		6.43e-12		0.00459	0.0294		1.86207		1.49942	2.53838		1.02694		-1.05178	1.13468		3	0	1	3		3/3
57326	PBXIP1	pre-B-cell leukemia homeobox interacting protein 1		1.19e-08		3.76e-08	0.041		1.70027		-1.80247	1.81691		1.04327		-1.25744	1.30332		1	1	1	1		3/4
57475	PLEKHH1	pleckstrin homology domain containing, family H (with MyTH4 domain) member 1		5.29e-07		0.000423	0.0386		1.4059		1.53379	5.76064		-1.14603		-1.50722	-2.45208		2	0	1	3		3/3
57530	CGN	cingulin		1.6e-07	0.00365		0.0062		2.48024	1.13873		2.89501		1.28765	1.15228		-11.8008		1	1	0	2		3/3
57553	MICAL3	microtubule associated monoxygenase, calponin and LIM domain containing 3		0.00229	0.00548	0.000105			1.21119	1.09584	1.5109			1.08765	1.08922	1.1037			2	2	1	3		3/4
57583	TMEM181	transmembrane protein 181		9.01e-13	0.00228	4.77e-06	0.0225		3.26988	1.12798	-4.8929	4.08008		-1.2073	-1.32672	-2.40419	-1.9689		1	1	1	1		4/4
57620	STIM2	stromal interaction molecule 2		1.99e-07	0.000405	1.66e-09	0.0302		1.2503	1.56854	3.25308	4.04075		1.05005	-1.38722	-1.4119	-1.18088		1	1	1	1		4/4
57655	GRAMD1A	GRAM domain containing 1A		0.00112	0.00721		0.0496		1.23131	1.09063		1.29401		1.66414	1.37581		3.09932		1	1	0	1		3/3
58516	LOC728115	similar to hCG2020539; family with sequence similarity 60, member A; similar to family with sequence similarity 60, member A		1.17e-07	0.00904		0.0141		1.67619	1.06499		-1.07662		1.81061	1.20674		1.67895		1	1	0	2		3/3
60481	ELOVL5	ELOVL family member 5, elongation of long chain fatty acids (FEN1/Elo2, SUR4/Elo3-like, yeast)		0.00216		0.00379	0.0354		-1.35952		1.69371	-2.56109		1.55595		-1.51543	4.6448		1	0	1	4		3/3
60592	SCOC	short coiled-coil protein		0.00584	4.88e-06	0.00915			1.50275	-1.07129	-1.40923			-1.62619	-1.2531	-1.10557			1	1	1	1		3/4
64083	GOLPH3	golgi phosphoprotein 3 (coat-protein)		0.00322	0.00819	0.00199			1.56472	-1.07645	-1.16089			1.13182	-1.69311	-1.46946			1	1	1	3		3/4
64097	EPB41L4A	erythrocyte membrane protein band 4.1 like 4A		0.000169	3.94e-05	0.00021			-1.22222	-1.16629	-1.41901			-1.01227	-1.38485	1.50469			1	1	1	2		3/4
64116	SLC39A8	solute carrier family 39 (zinc transporter), member 8		0.000704	0.00155		0.037		1.5372	1.88889		2.326		1.15176	-1.44625		-1.37225		1	1	1	3		3/4
64284	RAB17	RAB17, member RAS oncogene family		9.16e-06	0.00451		0.0345		1.33568	1.10742		4.43193		-1.02246	1.11905		-3.12693		1	1	0	1		3/3
64400	LOC100130746	AKT interacting protein; similar to AKT interacting protein		0.00633		1.62e-07	0.0226		-1.54526		-1.91397	-1.84249		1.11422		-1.32617	1.2326		1	0	2	3		3/3
64759	TNS3	tensin 3		1.68e-07		4.89e-11	0.0121		2.70047		2.5393	3.35104		1.64629		1.76612	1.36602		1	0	2	2		3/3
64838	FNDC4	fibronectin type III domain containing 4		0.00387	0.00361	2.05e-05			-1.94274	-2.48485	-2.00835			-1.0374	-1.06983	1.14558			1	1	1	1		3/4
64844	39142	membrane-associated ring finger (C3HC4) 7		0.000466	0.00374		0.0254		-2.19693	-2.86975		-4.49201		1.20165	-1.22997		3.47604		1	1	1	2		3/4
64854	USP46	ubiquitin specific peptidase 46		0.000782	0.00105	0.000731	0.0126		-1.12513	-1.43191	-2.38423	1.53298		1.01138	-1.103	-1.23399	-4.78431		2	1	1	1		4/4
64968	MRPS6	mitochondrial ribosomal protein S6		0.000685		8.73e-08	0.0351		1.05304		-5.24163	1.02618		1.53095		7.30144	2.75638		3	1	2	5		3/4
65009	NDRG4	NDRG family member 4		2.2e-07	0.00904		0.0108		-1.72252	-2.49234		-5.74074		-1.00328	-1.13119		3.62434		2	1	1	1		3/4
65010	SLC26A6	solute carrier family 26, member 6; cadherin, EGF LAG seven-pass G-type receptor 3 (flamingo homolog, Drosophila)		3.69e-10	5.42e-05	0.000225	0.0226		1.73755	1.33977	-3.33811	7.5597		1.0914	-1.03815	-1.46844	-2.24911		1	1	1	2		4/4
65977	PLEKHA3	pleckstrin homology domain containing, family A (phosphoinositide binding specific) member 3		1.89e-08	0.00712		0.0437		1.64096	1.06052		1.09681		1.11345	1.05706		-1.99121		1	1	0	3		3/3
65979	PHACTR4	phosphatase and actin regulator 4		0.000804	0.00752		0.0465		-1.79253	-1.68556		-2.78908		1.00311	-1.11633		1.0794		3	1	0	1		3/3
66004	LYNX1	Ly6/neurotoxin 1		2.25e-10		2.9e-06	0.0025		-25.0931		-2.11056	-3.22321		-1.11475		1.22112	2.07738		4	0	1	1		3/3
79004	CUEDC2	CUE domain containing 2		0.00052	0.000409		0.0122		1.48138	1.13292		1.06044		1.09515	1.1056		1.84547		1	1	0	1		3/3
79041	TMEM38A	transmembrane protein 38A		0.000348	0.000372		0.0126		1.2703	1.49904		1.6129		-1.15102	-1.20849		-2.99728		1	1	0	1		3/3
79585	CORO7	coronin 7		0.000463	0.00644		0.0409		1.21518	1.10657		1.71668		1.02796	1.10992		-2.9349		1	1	0	1		3/3
79603	LASS4	LAG1 homolog, ceramide synthase 4			7.78e-05	0.000106	0.031			-3.47212	1.08145	1.70563			-1.12083	2.01043	-2.15066		1	1	1	1		3/4
79669	C3ORF52	chromosome 3 open reading frame 52		7.3e-12	0.00206		0.0106		2.32432	-1.35745		3.47053		-1.04032	-1.29644		-1.62949		1	1	0	2		3/3
79817	MOBKL2B	MOB1, Mps One Binder kinase activator-like 2B (yeast)		3.55e-08	9.59e-05		0.0299		2.85349	1.34459		6.63163		-1.43285	-1.15136		-2.20837		1	1	0	3		3/3
79875	THSD4	thrombospondin, type I, domain containing 4		0.000223	0.000878		0.0273		-1.45842	-1.36047		-3.4462		-1.07676	1.0323		-1.01935		1	1	0	1		3/3
80019	UBTD1	ubiquitin domain containing 1		0.00532		0.00973	0.00355		-1.13124		-1.40236	-2.49635		1.25271		1.44168	5.25547		1	0	1	1		3/3
80195	C10ORF58	chromosome 10 open reading frame 58; chromosome 10 open reading frame 57		0.000126	0.00305		0.00185		-1.33642	1.1507		-3.07018		-1.01461	1.10668		1.00585		2	1	0	2		3/3
80196	RNF34	ring finger protein 34		4.9e-06	0.00204	0.000117			1.52902	-1.55341	1.63279			1.11821	1.12611	-1.15147			2	1	1	2		3/4
80232	WDR26	WD repeat domain 26		7.15e-05	0.000183		0.0025		-1.6984	-2.59535		-4.80365		-1.01741	-1.27596		1.86758		2	1	0	5		3/3
80267	EDEM3	ER degradation enhancer, mannosidase alpha-like 3		3.3e-08	0.00873	0.00679			2.51775	1.13737	-1.39883			-1.32555	1.13321	1.09591			1	1	1	2		3/4
80273	GRPEL1	GrpE-like 1, mitochondrial (E. coli)		0.00244	0.00204	2.07e-06			1.12329	-1.41335	-2.4224			1.25508	-1.18919	-1.15811			1	1	1	3		3/4
80301	PLEKHO2	pleckstrin homology domain containing, family O member 2		0.0052	0.000961	0.00162			1.03962	1.09239	-1.04556			1.29488	1.13848	1.84173			1	1	1	1		3/4
80303	EFHD1	EF-hand domain family, member D1		1.64e-05	0.00374	0.000449			1.2455	1.33902	1.88341			1.23689	1.16195	-1.18712			1	1	1	1		3/4
80824	DUSP16	dual specificity phosphatase 16		0.00175	0.00614	1.42e-06	0.0115		-1.32381	-1.17193	-3.8	-2.33465		1.05079	-1.06476	4.82083	1.08713		1	1	1	3		4/4
81609	SNX27	sorting nexin family member 27		1.44e-06	0.00973	5.4e-06			1.52282	1.1295	-2.97			1.31789	2	4.192			1	1	1	3		3/4
81618	ITM2C	integral membrane protein 2C		4.16e-13		1.25e-08	0.0182		7.40654		5.17708	3.98573		1.11798		-1.75247	-1.39249		1	0	1	2		3/3
81855	SFXN3	sideroflexin 3		1.28e-06		8.84e-09	0.0299		2.27699		2.41205	3.91883		1.34615		1.0054	1.95921		1	0	2	2		3/3
83543	AIF1L	allograft inflammatory factor 1-like		1.66e-07	0.00284		0.0181		-8.46501	-2.0477		-18.4912		1.01354	-1.02013		2.32745		1	1	0	1		3/3
83660	TLN2	talin 2		8.82e-13	0.00776		0.0405		3.18777	1.09036		7.04276		-1.10439	1.05307				2	1	1	2		3/4
83716	CRISPLD2	cysteine-rich secretory protein LCCL domain containing 2		3.99e-05		0.000171	0.0403		1.83931		-1.17276	11.0474		1.16115		1.89533	1.57788		1	0	2	1		3/3
84164	ASCC2	activating signal cointegrator 1 complex subunit 2		0.00242	0.00868	9e-07			-1.65261	-1.22323	-1.98117			-1.23881	-1.07466	-1.37387			1	1	1	1		3/4
84445	LZTS2	leucine zipper, putative tumor suppressor 2		0.00498	0.00283		0.0119		1.09178	1.05405		1.10581		1.12121	1.17379		1.73751		1	1	0	2		3/3
84447	SYVN1	synovial apoptosis inhibitor 1, synoviolin		0.000349	0.000366	0.00166			1.32885	-1.14815	-1.33004			1.16099	-1.05238	-1.03371			1	1	1	2		3/4
84910	TMEM87B	transmembrane protein 87B		1.92e-05	0.000759		0.000153		1.24573	-1.23289		1.42753		1.0274	-1.26456		-2.31358		1	1	0	1		3/3
85007	AGXT2L2	alanine-glyoxylate aminotransferase 2-like 2		0.000476		0.000179	0.0409		1.28034		1.38865	2.02405		-1.20404		-1.83036	-3.51642		2	1	1	3		3/4
85414	SLC45A3	solute carrier family 45, member 3		1.55e-12	0.000937		0.00851		3.60989	-1.23601		4.07494		-1.74271	1.12652		-3.34401		1	1	0	2		3/3
85450	ITPRIP	inositol 1,4,5-triphosphate receptor interacting protein		9.8e-06	0.00378		0.0031		-1.6902	-1.23787		-5.92778		1.03372	1.09467		4.17222		2	1	0	1		3/3
90488	C12ORF23	chromosome 12 open reading frame 23		1.17e-10	0.000971		0.0129		4.43353	2.03931		6.61252		-1.38198	-1.30171		-1.28315		1	1	1	3		3/4
93109	TMEM44	transmembrane protein 44		0.00054		0.000814	0.0302		1.31017		-1.061	2.23201		1.28504		1.58852	1.62664		1	0	1	1		3/3
94239	H2AFV	H2A histone family, member V		3.53e-06		0.000328	0.0361		1.43902		1.3125	1.09783		1.48588		1.21517	2.11957		3	0	1	6		3/3
113201	CASC4	cancer susceptibility candidate 4		1.07e-09		1.84e-07	0.0122		2.87744		2.11568	3.88561		-1.08652		-1.16903	1.01947		2	0	1	1		3/3
113452	TMEM54	transmembrane protein 54		3.45e-09		0.00188	0.0112		3.38674		1.68121	1.60664		-2.01645		-1.90707	-3.76651		1	0	1	2		3/3
113802	C1ORF59	chromosome 1 open reading frame 59		9.85e-11	0.0053		0.0126		2.2496	1.32802		4.83289		1.59341	-1.00833		-1.36828		1	1	0	1		3/3
118429	ANTXR2	anthrax toxin receptor 2		8.26e-06		9.94e-09	0.019		3.16705		3.45714	7.81939		1.2		1.01889	1.38797		1	0	1	1		3/3
121665	SPPL3	signal peptide peptidase 3		0.00197	0.000903		0.0159		-1.1507	-2.33088		-2.9683		1.06243	-1.22523		1.4755		1	1	0	2		3/3
124152	IQCK	IQ motif containing K		2.32e-11	1.73e-05	7.85e-05	0.0135		1.99139	3.31262	2.91525	5.49902		1.18669	-1.27573	1.90019	-1.00816		1	1	1	2		4/4
129642	MBOAT2	membrane bound O-acyltransferase domain containing 2		9.41e-05	0.000506		0.0359		-1.65498	-2.91489		-2.2093		-1.20272	-1.49389		1.29387		1	1	1	3		3/4
144423	GLT1D1	glycosyltransferase 1 domain containing 1		0.00155	0.00384		0.00703		-1.19591	1.11603		1.67954		1.41119	1.12687		1.9931		1	1	0	1		3/3
148022	TICAM1	toll-like receptor adaptor molecule 1		0.000197		0.000144	0.022		-2.2287		-2.01215	-2.87885		-1.07083		-1.11136	-1.06824		2	0	1	1		3/3
152137	CCDC50	coiled-coil domain containing 50		0.00147	0.000503		0.0386		1.20312	1.085		2.47034		1.07978	1.13116		1.52443		2	1	0	6		3/3
152485	ZNF827	zinc finger protein 827		2.52e-09		0.00174	0.0347		1.64747		-1.87485	2.38462		-1.02805		1.52612	1.06703		1	0	2	4		3/3
157378	TMEM65	transmembrane protein 65		1.91e-05		2.81e-05	0.0278		-1.5493		-3.17967	-1.37761		1.35467		2.56806	3.24108		1	0	1	1		3/3
203068	TUBBP2	tubulin, beta; similar to tubulin, beta 5; tubulin, beta pseudogene 2; tubulin, beta pseudogene 1		1.39e-05		1.5e-06	0.0433		1.00504		-7.60225	-2.38068		1.96612		8.62472	-1.51724		3	0	7	3		3/3
219931	TPCN2	two pore segment channel 2		2.51e-07	0.0055		0.0068		1.64884	1.16169		1.56804		1.24452	1.11682		-2.86853		1	1	0	2		3/3
221061	FAM171A1	family with sequence similarity 171, member A1		1.97e-10		1.03e-07	0.0195		3.91521		-4.68913	3.43319		-1.10021		1.00919	-2.56153		1	0	1	1		3/3
221178	SPATA13	spermatogenesis associated 13		8.44e-08	0.00146		0.00671		1.34463	-1.03024		9.04232		1.08167	-1.30573		1.07206		2	1	0	1		3/3
284996	RNF149	ring finger protein 149		0.00529		0.000816	0.0256		-1.00918		-4.6145	-2.10134		1.1051		4.80153	2.77438		3	0	1	4		3/3
375449	MAST4	microtubule associated serine/threonine kinase family member 4			0.00286	7.01e-06	0.0174			-4.42679	-1.61139	-2.71588			-1.42035	-1.07314	1.80537		1	1	2	5		3/4
378938	MALAT1	metastasis associated lung adenocarcinoma transcript 1 (non-protein coding)		0.00191		5.97e-07	0.00963		-2.08205		-6.60406	2.30535		1.51795		4.64975	-12.0144		1	1	1	4		3/4
400506	C16ORF88	chromosome 16 open reading frame 88		0.000366		0.00805	0.0427		1.13024		-1.06825	-1.3237		1.39479		-1.47433	-2.94218		1	0	1	1		3/3
400961	PAIP2B	poly(A) binding protein interacting protein 2B		0.000565		2.92e-07	0.00116		-1.57917		-2.79963	-3.66304		-1.10599		-1.42595	-1.35294		2	0	1	3		3/3
408050	NOMO3	NODAL modulator 3; NODAL modulator 1; NODAL modulator 2		1.53e-07		1.75e-06	0.0192		2.21555		1.78226	2.82306		1.02392		-1.41021	-1.32032		1	0	1	1		3/3
445329	SULT1A3	sulfotransferase family, cytosolic, 1A, phenol-preferring, member 4; sulfotransferase family, cytosolic, 1A, phenol-preferring, member 3		1.23e-07		4.88e-05	0.029		3.49893		3.844	5.02686		-1.11405		-2.55375	-2.81718		4	0	1	2		3/3
